# Supplementary material
Source: PubMed Central journal article supplement (PMC16141)
Supplement: gb-2000-1-6-research0012-S1.pdf [file gb-2000-1-6-research0012-S1.pdf]

## Non-LTR retrotransposons revealed in the Celera release 1 sequence

**Chr** – chromosome (for some elements from “small” sequences chromosomal location might be determined but indicated as unknown (?) in the tables)

**Cyt** – cytological localization interpolated from GenBank annotations

**Acc** – accession number preceded by a chunk part (sequences were processed in chunks of 3000000 nucleotides)

**S** – strand of Acc matching to element

**Coordinates** – coordinates of sequence from Acc chunk matching to element. Actual coordinates of the sequence in accession are calculated as (coordinates in chunk)+3000000\*(chunk part)

**Element** – part of full-length element matching to Acc chunk

**Len** – length of match

**Type** – type of element truncation: **F** – full-length element; **5'** – 5' truncated; **3'** – 3' truncated; **5'3'** – truncated at both ends; **?** – unfinished

**D** – length of target site duplication

**5' flank** – 10 nucleotides of 5' flank of the element

**TSD** – sequence of target site duplication

**Start** - 5' flank – 10 nucleotides of the element start

**End** – 20 nucleotides of the element end

**3' flank** – 10 nucleotides of 3' flank of the element

### BS

| Chr | Cyt         | Acc        | S | Coordinates     | Element   | Len  | Type | D  | 5' flank    | TSD            | Start      | End                   | 3' flank   |
|-----|-------------|------------|---|-----------------|-----------|------|------|----|-------------|----------------|------------|-----------------------|------------|
| 2L  | 34A-34A     | 2_AE002690 | + | 2277439 2279766 | 2796-5122 | 2327 | 5'   | 6  | ACTTGAACCT  | AGTAGG         | CCATATGCC  | AAATAAATATATAAAAAAAAA | AAATATTTTA |
| 3L  | 73A-73A3    | 1_AE002602 | - | 751038 756169   | 3-5124    | 5122 | F    | 14 | CAATTGAACCT | AAACGTTTTGCCGA | GTCGCAATC  | AAATATATAAAAAAAAAAAAA | CTCATGCACA |
| 2R  | 42A10-42A10 | 0_AE002769 | - | 154863 155438   | 4550-5124 | 575  | ?    | 0  | NNNNNNNNNN  |                | CTGAAAGCTA | AAAAAAAAAAAAAAAAAAAAA | CGGCCCA    |
| 2R  | 42A10-42A10 | 0_AE002769 | - | 159119 159782   | 1-659     | 659  | ?    | 0  | ACGGCCAGC   |                | GAAGTCGCAA | AGAAGATAATCTCAGCGATG  | NNNNNNNNNN |
| ?   | ?           | 0_AE002909 | - | 6393 7593       | 3-1196    | 1194 | .3'  | 0  | CAAGCGCAG   |                | AGTCGCAAT  | CACCTTATCAATGCTGACAG  | GCATTTTGT  |
| 3L  | 75C2-75C1   | 0_AE002602 | - | 1772676 1777752 | 2-5122    | 5121 | F    | 12 | ATTTCCATTT  | AGTTAATTGCAA   | ATAAGTCGCA | AAATAAATATAAAAAAAAA   | TCAGGAATGT |
| ?   | ?           | 0_AE003029 | + | 6345 7952       | 3261-5122 | 1862 | 5'   | 0  | TTTCCCCTGG  |                | TCAAACATCA | AACAAGAAATATAAAAAATA  | GTGACAGATT |
| 2L  | 38B5-38C    | 5_AE002690 | - | 84431 85579     | 3447-4592 | 1146 | 5'3' | 0  | AGCATCAGCC  |                | ATCATCCAGA | GTTCGCCAGCTACACCACC   | GGAGCAGGG  |
| 2L  | 38B5-38C    | 5_AE002690 | + | 87326 87563     | 2538-2774 | 237  | 5'3' | 0  | ATTGAGCGCT  |                | TCGCAACTGA | CTTGCAGACGTGCGATTGCA  | TCTCAAGACC |
| 2L  | 39C3-?      | 5_AE002690 | - | 1283543 1283943 | 4722-5122 | 401  | 5'   | 12 | TTACTCTGTAG | AGTAAAGGGTT    | ACCCATTTCA | AAATAAATATATAAACAAA   | TACTAAATTC |
| 3R  | 92E-92E2    | 4_AE002708 | + | 732410 733157   | 4373-5124 | 752  | 5'   | 13 | AACGACTTGT  | AATACCTGTAATA  | TATGGAATTT | TAAATAAATATATAAAAAA   | AAATGCCTTG |
| 3R  | 87A10-87A7  | 1_AE002708 | - | 1109009 1109251 | 4882-5124 | 243  | ?    | 0  | NNNNNNNNNN  |                | CAGTATACAT | TAAATATATAAAAAAAAA    | AATCTTTTGA |
| 3R  | 87A10-87A7  | 1_AE002708 | - | 1113374 1113878 | 3-502     | 500  | ?    | 0  | TCTTTTGTAG  |                | AGTCGCAAT  | TAACTCAAAGCAGTAGCGTC  | NNNNNNNNNN |
| 3L  | 65E-65D4    | 4_AE002602 | + | 1249072 1249627 | 4566-5121 | 556  | 5'   | 0  | GGGTTTTAGT  |                | GAAGACTTTT | AAATAAATATATAAAAAA    | GTGAAGACTT |
| X   | 16F5-16F7   | 2_AE002593 | - | 1366405 1366875 | 4653-5123 | 471  | 5'   | 12 | ATTTACATTT  | AGAATACAAGGC   | TCCACTGCGT | AAATAAATATATAAAAAA    | AAACCATAAT |
| 3R  | 90A-90A     | 3_AE002708 | + | 528070 528459   | 4736-5124 | 389  | 5'   | 0  | AAACTACTGT  |                | TTTCTAAGTT | AAAAAAAAAAAAAAAAAAAAA | GTTACTGAAT |
| X   | 7E2-7F      | 2_AE002566 | + | 2160628 2160950 | 4802-5124 | 323  | 5'   | 11 | CTCTAAATGC  | ATTGTTTAATT    | TTTCGTGATC | ATAGTAAAAAAAAAAAAAAAA | GATTCTCTGC |
| ?   | ?           | 0_AE003078 | - | 301 635         | 7-662     | 656  | ?    | 0  | TAACCGTTGT  |                | GCAAATCTGC | AAGATAACTCAGCGATGCT   | Gnnnnnnnnn |
| ?   | ?           | 0_AE003132 | - | 12855 13083     | 4612-4838 | 227  | 5'3' | 0  | GGAGCAATGC  |                | AATAAGCAAT | CACCTGTGGAAGAACAGATG  | GTAGAAGTTA |

Full-length elements: 2/0  
 5' truncated elements: 5/3  
 3' truncated elements: 0/1  
 5'3' truncated elements: 0/3  
 Unfinished elements: 5  
 Total number of elements: 19  
 Total length of elements: 22761  
 TSD lengths (min/max): 6/14

# Doc

| Chr | Cyt         | Acc        | S | Coordinates | Element | Len       | Type | D  | 5' flank    | TSD            | Start       | End                    | 3' flank    |
|-----|-------------|------------|---|-------------|---------|-----------|------|----|-------------|----------------|-------------|------------------------|-------------|
| 3L  | 76C-76C     | 0_AE002602 | + | 549830      | 554566  | 1-4719    | F    | 11 | AAATATAAGT  | AGCTTTTGTC     | ACATTCGGCA  | AAAAAAAAAAAAAAAAAAAA   | TTCGCCAG    |
| 3L  | 76C-76C1    | 0_AE002602 | + | 581258      | 585990  | 1-4715    | F    | 8  | TATTGGTCAA  | GAAATTTG       | TATTCGGCAT  | AAAAAAAAAAAAAAAAAAAA   | CCTTTACTC   |
| 3L  | 76A-76A     | 0_AE002602 | + | 1083265     | 1084589 | 3404-4719 | 5'   | 5  | TTTGACCGTC  | AAGATAAAA      | AAAGATAAAA  | AAAAAAAAAAAAAAAAAAAA   | GGTAGCAGCA  |
| 3L  | 75C2-75C1   | 0_AE002602 | - | 1696967     | 1698890 | 2801-4719 | 5'   | 11 | AATCTGTTTT  | AAAAATGATAG    | AGCGCGTGGT  | ATTAAAAAAAAAAAAAAAAA   | GTTTTTCAGA  |
| 2R  | 51A2-50E4   | 2_AE002787 | + | 329967      | 334693  | 1-4719    | F    | 13 | TTCAAATGCC  | AGAAGCTTTATG   | GTTCGGCATT  | AAAAATTAAAAAAAAAAAAA   | CATTTGGTTT  |
| 2R  | 31F2-49E6   | 2_AE002787 | + | 1582112     | 1586841 | 1-4719    | F    | 7  | TAAGACTGCT  | GACTGTG        | CCACATTCGG  | AAAAAAAAAAAAAAAAAAAA   | GTGTCTGCC   |
| 2L  | 33F1-33F1   | 2_AE002690 | - | 1778421     | 1778841 | 1-4715    | F    | 13 | AATTCACTGT  | ATTTATAGCAATT  | CGGCATTGCT  | ATTAAAAAAAAAAAAAAAAA   | AAATGTGATA  |
| 2L  | 34E-34C     | 2_AE002690 | + | 2441010     | 2445744 | 1-4719    | F    | 6  | AAAAAGCGTT  | GGGAG          | CGTTCGGCAT  | AAAAAAAAAAAAAAAAAAAA   | TAAGTAAATG  |
| 2L  | 34D4-34D1   | 2_AE002690 | - | 2789082     | 2790133 | 3671-4719 | 5'   | 13 | ACCGCGACAC  | AAATCAAACCACC  | ATGGACTTTT  | AAAAAAAAAAAAAAAAAAAA   | TCAAATAAAG  |
| 3L  | 79A-79A4    | 0_AE002647 | + | 1407868     | 1412601 | 1-4717    | F    | 11 | TGATCAACGC  | ACTGTTACCAC    | CGTTCGGCAT  | AAAAAAAAAAAAAAAAAAAA   | TCCGGCAACT  |
| 3L  | 79E4-79E    | 0_AE002647 | + | 2235719     | 2240455 | 1-4719    | F    | 13 | AGAGGAGCG   | AACTTGGTGAGCA  | CGGCATTCCA  | AAAAAAAAAAAAAAAAAAAA   | GGATGGGAGG  |
| 3L  | 79E-79F3    | 0_AE002647 | + | 2516855     | 2517932 | 3651-4719 | 5'   | 11 | TTACAATTTT  | AAATCAAAGG     | CATTTGACAG  | AAAAAAAAAAAAAAAAAAAA   | TCGCTCTATG  |
| 3R  | 93A-93B2    | 4_AE002708 | + | 1080708     | 1085448 | 1-4719    | F    | 14 | GGTTTGATCC  | ACAAAAACAACGGC | ATTGATTCGG  | TAAAAAAAAAAAAAAAAAAA   | GGCTTCCAA   |
| 3R  | 100D2-100D3 | 7_AE002708 | + | 2879265     | 2883994 | 5-4718    | F    | 7  | GATGAAACAC  | AGATATC        | ACAGTCTTCG  | AAAAAAAAAAAAAAAAAAAA   | CAATCAAGAG  |
| 3R  | 96A21-96A21 | 5_AE002708 | - | 1945604     | 1947916 | 2411-4719 | 5'   | 10 | ATTTATGAGT  | GAGAACGGTA     | TCCCAGGGTA  | AAAAAAAAAAAAAAAAAAAA   | GTGAAAAAT   |
| 3R  | 96B5-96B1   | 5_AE002708 | + | 2142683     | 2147420 | 1-4718    | F    | 11 | ATGTGAATTC  | GAGAAGTACA     | CACATTCGGC  | AAAAAAAAAAAAAAAAAAAA   | GATTAGGATA  |
| X   | 6A2-6A      | 2_AE002566 | + | 201267      | 206001  | 1-4719    | F    | 13 | CAGTCCAGTC  | AAGATGATGCTGC  | ATTCCGGCATT | AAAAAAAAAAAAAAAAAAAA   | TCGGTTTGT   |
| ?   | ?           | 0_AE002841 | - | 5908        | 10645   | 1-4719    | F    | 14 | TTTGTATCCC  | AAATTAGCGCCGC  | ATTCGGCATT  | AAAAAAAAAAAAAAAAAAAA   | AAGGCAAGA   |
| ?   | ?           | 0_AE003091 | - | 4105        | 8836    | 1-4719    | F    | 11 | ATAAGTCGTT  | AAGTACCATA     | TATATTGCGC  | AAAAAAAAAAAAAAAAAAAA   | CTACTGAATC  |
| X   | 12F1-12F5   | 1_AE002593 | - | 957289      | 962120  | 1-4719    | F    | 12 | TAAAAACAT   | AGTCCGCAAAA    | AAAAATTGCGC | AAAAAAAAAAAAAAAAAAAA   | GACAAATTACG |
| 3R  | 87E4-87F1   | 1_AE002708 | - | 2544540     | 2549361 | 1-4711    | F    | 14 | ATTTCTCGTC  | ACCTATCCCTTCTT | TTTTGGCATT  | AAAAAAAAAAAAAAAAAAAA   | AAAAATATT   |
| 3L  | 65D3-65D1   | 4_AE002602 | + | 1461444     | 1463407 | 2758-4719 | 5'   | 3  | CACTAAAGTT  | ATG            | AAATTATCTT  | AAAAAAAAAAAAAAAAAAAA   | TTGCAGTTAA  |
| 3L  | 65A-64F     | 4_AE002602 | + | 2194672     | 2196987 | 2403-4715 | 5'   | 5  | GTTCATCGTC  | TTGTG          | AACTTTTTTAG | AAAAAAAAAAAAAAAAAAAA   | TCGCTTGCCA  |
| ?   | 25D6-25E1   | 0_AE002690 | - | 400547      | 402868  | 2399-4719 | 5'   | 11 | TTATCAACT   | AAGAGAGCGAA    | TTATCCCGCG  | AAAAAAAAAAAAAAAAAAAA   | CATTTTGGG   |
| ?   | ?           | 0_AE003003 | - | 22500       | 24423   | 26-1944   | 5'   | 6  | AACCGTAAAG  | TTGGC          | GACGTGTTTT  | TCTGTGGAACGCAAAATG     | TCGCCACTGT  |
| 3R  | 84A5-84A5   | 0_AE002699 | + | 958757      | 960485  | 2991-4718 | 5'   | 8  | AACTCTCAAT  | AATCACGA       | GCTCACAGAA  | TAAAAAAAAAAAAAAAAAAA   | AATCAATGCA  |
| 3L  | 67E4-67D5   | 3_AE002602 | + | 843856      | 846123  | 2416-4715 | 5'   | 11 | TTAGTGTGTC  | AAGAAGGAGAG    | AAGGTCCCGG  | AAAAAAAAAAAAAAAAAAAA   | CAACACGATG  |
| 3L  | 67B10-67B1  | 3_AE002602 | - | 1865065     | 1867903 | 1886-4719 | 5'   | 11 | TTTAGAGTTC  | AGTTGAGCAGC    | AGCTCACACA  | AAAAAAAAAAAAAAAAAAAA   | TCAGTCCGCTG |
| 3R  | 88E-88E8    | 2_AE002708 | - | 1272754     | 1276563 | 1012-4712 | 5'   | 12 | AATGGGTTAT  | AGAGGTGTTTTG   | TTTTCAGACCA | AAAAAAATTAAAAAAAAAAA   | TTGCTTTGTG  |
| 3L  | 73A3-72F2   | 1_AE002602 | - | 833314      | 835608  | 2439-4719 | 5'   | 7  | TGCAATTTCAC | TTTTTCA        | ACATCAACAG  | AAAAAAAAAAAAAAAAAAAA   | TTGTTTTCCAT |
| 3L  | 70F2-70E1   | 1_AE002602 | - | 2558211     | 2558211 | 867-4719  | 5'   | 13 | AAATTTGTTT  | AGTTAGTAGTTAG  | GCCTCCACCA  | AAAAAAAAAAAAAAAAAAAA   | ACCTTCAAGC  |
| ?   | 30A-30A7    | 0_AE002690 | - | 1264622     | 1269448 | 1-4719    | F    | 12 | TGAAGTTAAC  | ATCTCAATGAC    | CGGCATTCCA  | AAAAAAAAAAAAAAAAAAAA   | GAAAGAACTT  |
| 2L  | ?           | 0_AE003176 | - | 15000       | 18710   | 1118-4718 | 5'   | 12 | AACTCGAACC  | ACATCAATCCC    | CCAGCAACAG  | AAAAAAAAAAAAAAAAAAAA   | TATGCTCCTA  |
| 3L  | 68D3-68C8   | 2_AE002602 | - | 2535017     | 2539839 | 4-4718    | F    | 11 | AAATTTGATTT | GATTTGAAGAA    | TCAAATCTTC  | ATAAAAAAAAAAAAAAAAAAA  | CACTGTATTT  |
| 3L  | 63B8-63C6   | 1_AE002584 | + | 255932      | 256361  | 4290-4719 | 5'   | 12 | CATGGCGAATC | AAATAGCAAAGG   | AAACGGCTCC  | AAAAAAAAAAAAAAAAAAAA   | CGAGGCAACA  |
| ?   | ?           | 0_AE003403 | + | 5907        | 7116    | 3506-4718 | 5'   | 11 | TTTAGGCGAC  | AAAAATATTGC    | GATCGAACAG  | ATAAGTTAAAAAAAATAA     | TGCCCTTGC   |
| 3R  | 84F2-84F6   | 0_AE002708 | + | 493188      | 493972  | 3938-4714 | 5'   | 5  | TTGGTGTGGC  | AGGGC          | TGTTTCCAAG  | AAAAAAAAAAAAAAAAAAAA   | CGTGTGCGCA  |
| ?   | ?           | 0_AE003267 | - | 688         | 866     | 3712-4045 | 5'   | 10 | ATGTTAAAAA  | TAATCAAACA     | TACATAAGCT  | AAAAAAAAAAAAAAAAAAAA   | AAGCTGCCCG  |
| 3L  | 76B6-76B    | 0_AE002602 | + | 893176      | 893784  | 4119-4719 | 5'   | 0  | AACGGTACCT  |                | TAGGAGTACA  | AAAAAAAAAAAAAAAAAAAA   | TGGCGGTGG   |
| 3L  | 75B5-75A    | 0_AE002602 | - | 2417395     | 2417672 | 6-283     | ?    | 0  | ATTAATTTAT  | 278            | TTCCACAGTC  | TCTTTACAACCGCACAAATG   | NMNMNMNMNM  |
| 2L  | 32E-32E1    | 2_AE002690 | - | 254296      | 254772  | 1-477     | ?    | 0  | AACCTAAAT   |                | CGGCATTCCA  | GGGCCAAACGACCGTCCCGG   | NMNMNMNMNM  |
| 2L  | 33F1-33F1   | 2_AE002690 | + | 1824790     | 1825216 | 3269-3695 | 5'   | 0  | CCAATATGCT  |                | ACACCGGAAA  | CGCCTAATGTTTAAAAATTA   | AAACANMNMNM |
| 2L  | 33F1-33F1   | 2_AE002690 | - | 1828001     | 1828568 | 4157-4718 | 5'   | 0  | NMNMNMNMNM  |                | CACATTTGAG  | AAATAAAAATTAAAAAAAAA   | TCCTTTCTTCA |
| 3L  | 33F1-77B3   | 0_AE002647 | + | 7202        | 8444    | 3211-4708 | 5'   | 6  | GTAGAGATAT  | TGAAGG         | GAGTGGCAGG  | TAAGCAAAACATGAAAAAAA   | CTAGTTTTCC  |
| 3R  | 92D1-92E    | 4_AE002708 | - | 474298      | 474662  | 1227-1591 | 5'   | 5  | AAATTTAAAA  | AAGGA          | CAACTTTGAA  | GAAACAGCGCGCGGCACACC   | TCAGCTACCC  |
| X   | 3D5-3D      | 1_AE002566 | + | 362539      | 362833  | 1113-1408 | 5'   | 3  | AAAGCGCAG   |                | ATTGATGCAA  | CCGCTACTATACACTGAAATC  | TAATCTAGGA  |
| X   | 3D5-3D      | 1_AE002566 | + | 377038      | 377468  | 4183-4617 | 5'   | 3  | GAGTGTCCGC  | GGG            | TAGACTAAAA  | TGTTAGTCTCTTAAGTAAAA   | CAAATTCAAA  |
| 3R  | 94C8-94D1   | 5_AE002708 | + | 96451       | 96996   | 1-546     | ?    | 0  | AGTTGGCATT  |                | CGGCATTCCA  | CACAACATCAACTTCGTGAG   | NMNMNMNMNM  |
| 3R  | 96C1-96C    | 5_AE002708 | - | 2540093     | 2540680 | 4136-4719 | 5'   | 0  | NMNMNMNMNM  |                | AGGCGGTCCA  | AAAAAAAAAAAAAAAAAAAA   | CAACATCTTC  |
| 3R  | 96C1-96C    | 5_AE002708 | - | 2543999     | 2544528 | 201-722   | 5'   | 0  | GAAATCAACN  |                | AGGAAATGAT  | AGCTCAGCTCCTCAAACAAAT  | NMNMNMNMNM  |
| 2L  | 36E1-36E1   | 4_AE002690 | + | 1377269     | 1377845 | 1-576     | ?    | 0  | AACTTAAAGA  |                | CGGCATTCCA  | ATTTATTCGCTGGCGCAGCTG  | NMNMNMNMNM  |
| 2L  | 36E1-36E1   | 4_AE002690 | + | 1381950     | 1382273 | 4397-4719 | 5'   | 0  | NMNMNMNMNM  |                | AACGAAAACA  | AAAAAAAAAAAAAAAAAAAA   | CCCTAAAGAC  |
| 2L  | 37D2-37D2   | 4_AE002690 | + | 2313484     | 2313896 | 1-413     | ?    | 0  | TTTTGCAGTT  |                | CGGCATTCCA  | TGCCTGCTTCGGCTCAACAG   | NMNMNMNMNM  |
| 2L  | 37D2-37D2   | 4_AE002690 | + | 2322671     | 2323265 | 4129-4719 | 5'   | 0  | NMNMNMNMNM  |                | CTTCGACAGG  | AAAAAAAAAAAAAAAAAAAA   | ATTTTTTGTG  |
| 2L  | 38A1-38A1   | 4_AE002690 | + | 2644838     | 2645303 | 4253-4719 | 5'   | 0  | NMNMNMNMNM  |                | CTTCTATCAA  | AAAAAAAAAAAAAAAAAAAA   | AAATTTTTTC  |
| 3L  | 67C-69      | 3_AE002602 | + | 1732182     | 1733805 | 3100-4719 | 5'   | 11 | TTTGTAGGTT  | AAAAGTACTTT    | ACAAAATGTA  | TAAAAAAAAAAAAAAAAAAAA  | TAAGCTGAAG  |
| 2R  | 42A2-41F9   | 0_AE002769 | + | 352937      | 353465  | 1707-2237 | 5'   | 0  | AAGTGCACCT  |                | CTACTCGGGA  | CCGCTATACTTGCCCCCCCC   | CACCACACC   |
| ?   | ?           | 0_AE002910 | + | 29055       | 29944   | 1729-2608 | 5'   | 0  | TCGGGAGAA   |                | CAGAAAATAA  | AGCAGCCCTCAGCGGTGACA   | GGCAACAGGT  |
| 2R  | 43F2-43E6   | 4_AE002787 | + | 807223      | 807768  | 1-546     | ?    | 0  | ATTCGGCATT  |                | CGGCATTCCA  | CACAACATCAACTTCGTGAG   | NMNMNMNMNM  |
| 2R  | 43F2-43E6   | 4_AE002787 | + | 811253      | 811693  | 4274-4714 | 5'   | 0  | NMNMNMNMNM  |                | AAACCTATCT  | ATTAAAAAAAAAAAAAAAAAAA | GTCTGAAAAT  |
| ?   | ?           | 0_AE003322 | + | 35912       | 36973   | 3658-4716 | 5'   | 0  | AATCAGCGGG  |                | TGACCGAGTC  | TAAAAAATTAAAAAAAAAAAA  | CTAGGTTCTC  |
| 2L  | 28D5-28D    | 1_AE002690 | + | 62407       | 62891   | 4236-4719 | 5'   | 0  | NMNMNMNMNM  |                | GTCTGGAGTT  | AAAAAAAAAAAAAAAAAAAA   | CCAAAACCTAA |
| ?   | ?           | 0_AE002751 | + | 31980       | 32257   | 4435-4713 | 5'   | 0  | TTTTTTGTC   |                | AATCGATAGA  | AAAAACAACAACAACAACA    | CTCTTTGTGA  |
| ?   | ?           | 0_AE002751 | - | 75672       | 76877   | 3515-4716 | 5'   | 0  | AAAAAGCGGA  |                | AATACAATAC  | TTAACAAAAAACAACAACA    | TGTTGCTAAT  |
| ?   | ?           | 0_AE003029 | - | 21073       | 21799   | 842-1567  | 5'   | 0  | TTGAGATTTG  |                | ACCGCACAAG  | AAGACCCCTTTAACAAAACG   | CGGAAATCA   |
| 3R  | 90C-90D1    | 3_AE002708 | + | 1272591     | 1273199 | 4119-4719 | 5'   | 0  | TAACGTACCT  |                | TAGGAGTACA  | AAAAAAAAAAAAAAAAAAAA   | GTAGGTTTFT  |
| 3L  | 64C5-?      | 1_AE002584 | + | 2017804     | 2018356 | 1-554     | ?    | 0  | AACTTAGACT  |                | CGGCATTCCA  | TCACTTCGCGCGCCCAA      | NMNMNMNMNM  |
| 3L  | 64C5-?      | 1_AE002584 | + | 2022388     | 2022900 | 4207-4719 | 5'   | 0  | NMNMNMNMNM  |                | CTGGCTCATA  | AAAAAAAAAAAAAAAAAAAA   | CTTAGATTTA  |
| 2L  | 35A3-35B1   | 3_AE002690 | - | 491717      | 492160  | 4272-4719 | 5'   | 0  | TAAATTTTGT  |                | TAAAAAACA   | AAAAAACAACAACAACA      | GTTAAAGACT  |
| 2L  | 35A3-35B1   | 3_AE002690 | - | 494597      | 495190  | 2732-3327 | 5'   | 0  | TACGAAGAAA  |                | TCTGGTTTAA  | CTTCACATCTGCTGTTGTT    | NMNMNMNMNM  |
| 2L  | 36B2-36C2   | 3_AE002690 | + | 2928594     | 2929053 | 1-460     | ?    | 0  | TTTTTATCT   |                | CGGCATTCCA  | ACCCCGCTCCTTCGACGCG    | NMNMNMNMNM  |
| ?   | ?           | 0_AE002992 | - | 9063        | 9393    | 3749-4081 | 5'   | 0  | TTCAGCACT   |                | AGATGAATTC  | CTGCCCGCCCTTGCTCAAT    | GCCCTCAGC   |
| ?   | ?           | 0_AE002992 | - | 10841       | 11078   | 1821-2055 | 5'   | 0  | CACACAACA   |                | ACCATCATTC  | AACTTCCAATACCGGATA     | TAAAGGCCCA  |
| ?   | ?           | 0_AE002693 | + | 2003        | 2989    | 2846-3983 | 5'   | 0  | GGTGCACCT   |                | CAGTCCAATA  | CCGACACTTAAGCTGATAAC   | CTTAACTCTG  |

|    |           |            |   |         |         |           |      |      |    |            |             |                  |             |
|----|-----------|------------|---|---------|---------|-----------|------|------|----|------------|-------------|------------------|-------------|
| 2R | 46A-46B1  | 3_AE002787 | + | 1960099 | 1961439 | 3365-4708 | 1344 | 5'   | 0  | CTCATCTGTT | TGGATGTGGT  | CAAAAATGTGAAAAA  | CTTTGTTAGC  |
| ?  | ?         | 0_AE003027 | - | 301     | 647     | 1-647     | 647  | .    | 0  | AAGTCGGATT | CGGCATTC    | GAAGAATCAAAACAA  | Gnnnnnnnnn  |
| ?  | ?         | 0_AE003048 | - | 15565   | 16095   | 3111-3647 | 537  | 5'3' | 0  | CTGATCATCT | TATTTCAACC  | AGACGTTGCAACAGC  | ATAGAGTATG  |
| 2L | 22A4-22A3 | 1_AE002638 | + | 203048  | 203770  | 1776-2487 | 712  | 5'?  | 0  | AACAAAAACT | GAAGCTATGA  | ATCGACTTCGAGTT   | NNNNNNNNNN  |
| 2L | 22A4-22A3 | 1_AE002638 | - | 312719  | 312990  | 1923-2193 | 271  | 5'?  | 0  | TCTGAACTTG | CTACGTGGAA  | ACATCTATCAACAT   | GGATNNNNNN  |
| ?  | ?         | 0_AE003090 | + | 26902   | 27487   | 2-585     | 584  | ?    | 0  | CCTCAATTAT | GGCAATTC    | TGTGCCAGCTGTAAT  | NNNNNNNNNN  |
| ?  | ?         | 0_AE003064 | - | 21480   | 21716   | 4188-4718 | 531  | ?    | 0  | nnnnnnnnnn | TTAAAGCAAG  | AAAAAAAAAAAAAAAA | G7AAAGATCT  |
| ?  | ?         | 0_AE002962 | + | 372     | 870     | 26-524    | 499  | 5'?  | 0  | GAGATTCGCG | GACGTGTTTC  | CAGTGACCTCACTG   | NNNNNNNNNN  |
| ?  | ?         | 0_AE002743 | - | 34346   | 34612   | 3400-3665 | 266  | 5'3' | 0  | AAGCAAGGAT | CGCTCAGGAT  | CGCTCAGGATTTG    | CAGACACTAA  |
| ?  | ?         | 0_AE002743 | - | 82056   | 83119   | 3653-4716 | 1064 | 5'   | 0  | AATGAAATCA | GCATTTGACC  | TAAGTTAAAAA      | TAAACTTAA   |
| ?  | ?         | 0_AE002639 | - | 10294   | 11013   | 126-853   | 728  | 5'?  | 0  | TCTTATTTTC | TTTTCTGACTA | CAACGAAAAA       | NNNNNNNNNN  |
| ?  | ?         | 0_AE002782 | + | 3920    | 4361    | 1-442     | 442  | ?    | 0  | AATTTATTTT | CGGCATTC    | GAGAGACCCGCT     | NNNNNNNNNN  |
| ?  | ?         | 0_AE003173 | - | 10559   | 11125   | 2999-3571 | 573  | 5'3' | 0  | CTCGTGTGG  | AAAGACCACA  | AACATGGAGCG      | CGAGCACAT   |
| ?  | ?         | 0_AE002770 | + | 301     | 334     | 4387-4719 | 333  | ?    | 0  | nnnnnnnnnn | TACCTTCGAA  | AAAAAAAAAAAA     | AAATTGCAAT  |
| ?  | ?         | 0_AE002873 | - | 1372    | 1466    | 4174-4570 | 397  | ?    | 0  | nnnnnnnnnn | GACGCACCTC  | ACCAACCAGCC      | TTTGACGGG   |
| ?  | ?         | 0_AE002687 | - | 8213    | 8519    | 3280-3589 | 310  | 5'3' | 0  | ACTTGAGCCG | GCTCGTTAAA  | AGGCCAATCGAA     | TTTTGGATT   |
| ?  | ?         | 0_AE003032 | + | 29549   | 29694   | 3515-3950 | 436  | 5'?  | 0  | AAAAAGCCGA | AATACAATAC  | ATGCCCAGCAA      | AGCAACTTgn  |
| 2R | 54C-54B   | 1_AE002787 | - | 252102  | 252621  | 4205-4718 | 514  | ?    | 0  | NNNNNNNNNN | CACCTGGCTCA | AAATAAAAAA       | TTGTTTAGAC  |
| ?  | ?         | 0_AE003351 | + | 301     | 378     | 4257-4637 | 381  | ?    | 0  | nnnnnnnnnn | ATATAACTCC  | TTAGTTAGTTT      | AAAAATGCCAA |
| ?  | ?         | 0_AE003253 | + | 23803   | 23716   | 26-239    | 214  | 5'?  | 0  | GAGATTCGCG | GACGTGTTTC  | ACATACGTTCT      | nnnnnnnnnn  |
| ?  | ?         | 0_AE002952 | - | 14500   | 14408   | 4510-4717 | 208  | ?    | 0  | nnnnnnnnnn | ACTAATCCGA  | AAAAAAAAAAAA     | TTCAACTCA   |
| ?  | ?         | 0_AE002832 | + | 743     | 1081    | 4373-4706 | 334  | 5'   | 0  | CAGATTCGGA | CAGATTCGCT  | AGCAAAAAAT       | GTGTGGCAT   |
| X  | 5A6-5C3   | 1_AE002566 | + | 2535884 | 2540620 | 1-4718    | 4718 | F    | 0  | CACGTAATTT | CGGCATTC    | AAAAAAAAAAAA     | TATATTGTAT  |
| 2L | 36E4-36F  | 4_AE002690 | + | 1550895 | 1553697 | 1924-4715 | 2792 | 5'   | 0  | AAAAGTACAA | TCTGTGGAAC  | AAAAAAAAAAAA     | TGATTTCAAG  |
| ?  | ?         | 0_AE002781 | + | 7219    | 9577    | 2335-4714 | 2380 | 5'   | 0  | TGTGTGAACA | GGGATCTCGA  | AAAAAAAAAAAA     | TTTTTTGGG   |
| 2R | 41F11-41C | 0_AE002769 | - | 991680  | 993667  | 2944-4080 | 1137 | 5'3' | 0  | CACACTAAG  | ATACATCGAG  | TTCCCGCCTTG      | GGTATTCATC  |
| 2R | 41C-?     | 0_AE002769 | - | 1285880 | 1287085 | 3329-4588 | 1260 | 5'3' | 0  | GCCTTCGAC  | AACCTCTATC  | AAATTTGTTAG      | CTTTTACTAT  |
| ?  | ?         | 0_AE003322 | + | 38378   | 39058   | 3963-4719 | 757  | 5'   | 0  | CAGTGGGAAG | GCCACACAAA  | AAAAACAAAAA      | CATTTTGTGG  |
| 3L | 71A2-70F1 | 1_AE002602 | + | 2457086 | 2457987 | 2784-4607 | 1824 | 5'?  | 0  | GCATTTCTTT | TCAAACTAA   | TGAAAAAATA       | NNNNNNNNNN  |
| ?  | ?         | 0_AE003029 | - | 18007   | 19374   | 3261-4687 | 1427 | 5'3' | 0  | CCAAAAATC  | ACCTGGTGA   | AAAGAGAGAT       | TTGATCTTT   |
| 2L | 38B5-38C  | 5_AE002690 | - | 261707  | 263044  | 2461-4718 | 2258 | 5'   | 0  | TTGGTTTATT | ACACCTGATC  | AAAAAAAAAAAA     | GTTATCTCTT  |
| ?  | ?         | 0_AE002734 | + | 13164   | 14953   | 1298-3665 | 2368 | ?    | 0  | NNNNNNNNNN | CTTGCTCATC  | CGCGCAGGCA       | CTAAGACCTT  |
| ?  | ?         | 0_AE002734 | + | 16185   | 16415   | 4096-4333 | 238  | 5'3' | 0  | GAATAACATA | ACAAACCGAC  | CGTCCATCAGT      | TGAGAACCAT  |
| ?  | ?         | 0_AE002612 | - | 33794   | 34123   | 4390-4719 | 330  | ?    | 0  | NNNNNNNNNT | CCTTCGGAAC  | AAAAAAAAAAAA     | AAAAATAAAT  |
| ?  | ?         | 0_AE002612 | - | 34176   | 34813   | 1-638     | 638  | ?    | 0  | AATCGGGATT | CGGCATTC    | CACGTAAGAGA      | NNNNNNNNNN  |
| ?  | ?         | 0_AE002903 | + | 7161    | 8578    | 3129-4577 | 1449 | 5'3' | 0  | CTTAAAAAAG | CCACTAGCTC  | GCCCAGCATT       | TTTCAATATT  |
| ?  | ?         | 0_AE003217 | + | 12829   | 13180   | 3186-3536 | 351  | 5'3' | 0  | TACTCTCCCG | CCTTTTAACT  | CGCCTTTGAA       | ACTGCACAGC  |
| 2L | 36F-36F7  | 4_AE002690 | - | 1603146 | 1607969 | 1-4719    | 4719 | F    | 0  | TTCGTTCATT | CGGCATTC    | AAAAAAAAAAAA     | CAAAATGGCT  |
| X  | 17E9-18C1 | 2_AE002593 | - | 2232808 | 2237626 | 3-4719    | 4717 | F    | 0  | TTTAAATAGT | GCATTCACA   | AAAAAAAAAAAA     | CTGGTAATAT  |
| 3L | 65D5-65D2 | 4_AE002602 | - | 1383785 | 1388611 | 1-4718    | 4718 | F    | 0  | CTGTTACATT | CGGCATTC    | AAAAAAAAAAAA     | CTGGTATTCT  |
| 3R | 65D5-84D4 | 0_AE002699 | - | 133292  | 138102  | 10-4719   | 4710 | F    | 0  | GGATAACATA | ACAGTCTTCG  | AAAAAAAAAGTT     | CTATTTGTTA  |
| 2R | 41F11-41C | 0_AE002769 | - | 990835  | 991314  | 3600-4080 | 481  | 5'3' | 0  | GCAGGGGCTA | CTGCTTTGAA  | TTCCCGCCTTG      | GGTATTCATC  |
| 2R | 41F11-41C | 0_AE002769 | + | 1209234 | 1210389 | 3520-4705 | 1186 | 5'   | 0  | AATTCCTCGC | ACTCCCATCG  | AAATTAACACT      | CGCCGGCCT   |
| 2R | 44D-44C1  | 4_AE002787 | - | 278860  | 283682  | 1-4713    | 4713 | F    | 11 | GCAGCGGCT  | CATTCCGCAT  | AAATTAACAA       | GGACCAAGC   |
| ?  | ?         | 0_AE003119 | + | 3069    | 5455    | 829-3994  | 3166 | 5'3' | 0  | CGGATTCGTC | AACCGAACAA  | CTGTAGAACG       | T7AAACAAAC  |
| ?  | ?         | 0_AE003083 | + | 928     | 1481    | 1016-1749 | 734  | 5'3' | 0  | ACACCAAATT | CNAATTATC   | CCGAACAAT        | AAATCATCGT  |
| ?  | ?         | 0_AE003083 | + | 2258    | 3659    | 3085-4709 | 1625 | 5'   | 0  | CTCTGGCACC | TGTTTTCGCG  | AAAAATCTT        | GATTTTTCG   |
| ?  | ?         | 0_AE002894 | + | 6230    | 8748    | 1729-4698 | 2970 | 5'3' | 0  | ATTTACTGCA | CGAAGAATA   | GCAAAATAA        | TTGTTATTAT  |
| ?  | ?         | 0_AE002989 | + | 11310   | 11563   | 414-660   | 247  | 5'3' | 0  | GCTTTTGCTC | TCGCGGAGCG  | AAAGCAGAA        | AGAAATCCGC  |
| ?  | ?         | 0_AE002989 | + | 11607   | 11912   | 1575-1873 | 299  | 5'3' | 0  | GGTTTAACTG | ATAGCAAATA  | ATCTTCAAA        | GGCTTCCCTA  |
| ?  | ?         | 0_AE002989 | + | 12459   | 12777   | 3219-3536 | 318  | 5'3' | 0  | ATTATGTGAA | TTAGCAAAGG  | GAACCATCG        | GGAAATCCCT  |
| ?  | ?         | 0_AE002872 | + | 13501   | 14692   | 3357-4645 | 1289 | 5'3' | 5  | GTCAATAAAG | CTCAAACTG   | AAGACTAAG        | AACATGCAAA  |
| 2L | 39F3-39E  | 0_AE002725 | - | 95163   | 95766   | 94-1131   | 1038 | 5'3' | 0  | CAGTGCAGTG | AAAGTTGAAC  | CATTGTAGCA       | TCTTTCAGAC  |
| ?  | ?         | 0_AE002754 | + | 301     | 545     | 4157-4715 | 559  | 5'   | 0  | CTCGCCTTCT | ACCTAGAATC  | TTAAAAA          | TTTTTCTAGA  |

Full-length elements: 19/5  
5' truncated elements: 20/16  
3' truncated elements: 0/0  
5'3' truncated elements: 5/25  
Unfinished elements: 38  
Total number of elements: 128  
Total length of elements: 218491  
TSD lengths (min/max): 3/14

## F

| Chr | Cyt       | Acc        | S | Coordinates | Element | Len       | Type | D    | 5' flank | TSD        | Start      | End       | 3' flank   |
|-----|-----------|------------|---|-------------|---------|-----------|------|------|----------|------------|------------|-----------|------------|
| 2R  | 42A2-41F9 | 0_AE002769 | + | 353493      | 355114  | 2610-4242 | 1633 | 5'   | 0        | GCAGTATTAG | AGCTCACAAA | AATTA     | TTGCTTATCC |
| 2R  | 41F11-41C | 0_AE002769 | + | 695417      | 698155  | 1-2732    | 2732 | 3'   | 0        | CTCGTCATCG | CTGCACCCGC | CTAAGAAAT | CTTCTCGGA  |
| 2R  | 41F11-41C | 0_AE002769 | + | 700272      | 704510  | 1-4242    | 4242 | F    | 0        | CTCGTCATCG | CTGCACCCGC | AAAAAAAAA | TTACTATTT  |
| 2R  | 41F11-41C | 0_AE002769 | - | 716685      | 718889  | 1-4240    | 4240 | F    | 0        | CTCGTCATCG | CTGCACCCGC | AAAAAAAAA | GGAACTTTAT |
| 2R  | 41F11-41C | 0_AE002769 | - | 725757      | 727557  | 2439-4233 | 1795 | ?    | 0        | NNNNNNNNNN | ACGATCAGCG | GTAATAA   | GTGTGGACA  |
| 2R  | 41F11-41C | 0_AE002769 | + | 929298      | 929684  | 329-724   | 396  | 5'3' | 0        | TGCCACTGAA | TCAGTCGATA | AAACAAAGT | ATCCACCTTC |
| 2R  | 41F11-41C | 0_AE002769 | + | 946401      | 948791  | 799-3885  | 3087 | 5'3' | 0        | GTCGCCTCTA | ACGCTTTTGT | ACAGATTG  | GAAAGATCA  |

|               |             |            |   |         |         |           |      |       |    |             |             |                         |            |
|---------------|-------------|------------|---|---------|---------|-----------|------|-------|----|-------------|-------------|-------------------------|------------|
| 2R            | 41C-?       | 0_AE002769 | + | 1334187 | 1334651 | 3766-4239 | 474  | ?     | 0  | NNNNNNNNN   | GCTCATCAAC  | AAAAAAAAAAAAAAAAAAAA    | TGCGTGCTA  |
| X             | 12E5-12F1   | 1_AE002593 | - | 596108  | 600356  | 1-4242    | 4242 | F     | 0  | CTCGTCATCG  | CTGCACCCGC  | AAAAAAAAAAAAAAAAAAAA    | TTTAAAACAT |
| X             | 20A5-20     | 0_AE002629 | - | 152742  | 156987  | 1-4236    | 4236 | F     | 0  | CTCGTCATCG  | CTGCACCCGC  | AAAAAAAAAAAAAAAAAAAA    | TTTATTATAC |
| 2R            | 43B2-42D1   | 4_AE002787 | + | 1473469 | 1477718 | 1-4241    | 4241 | F     | 0  | CTCGTCATCG  | CTGCACCCGC  | AAAAAAAAAAAAAAAAAAAA    | CTTTTAAAGT |
| 2L            | 33F1-33F1   | 2_AE002690 | + | 1766365 | 1770610 | 1-4242    | 4242 | F     | 0  | CTCGTCATCG  | CTGCACCCGC  | TAAAAAATAAAAAAAAAA      | TTTTTTCTTT |
| 2L            | 33F1-33F1   | 2_AE002690 | + | 1824790 | 1825221 | 2780-3211 | 432  | 5'?   | 0  | TCCAATATGC  | ACACCGGAAA  | CTAATGTTTAAATTAACA      | NNNNNNNNN  |
| 2L            | 33F1-33F1   | 2_AE002690 | - | 1828001 | 1832187 | 623-4235  | 3613 | 5'.   | 13 | TTATTCAAIT  | TTAGCCAAA   | TAAAATAAAAAATAAAAA      | ATTGCCAAT  |
| 2L            | 34D4-34D4   | 2_AE002690 | + | 2597230 | 2601484 | 1-4238    | 4238 | F     | 0  | CTCGTCATCG  | CTGCACCCGC  | AAAAAAAAAAAAAAAAAAAA    | TTTCTCTT   |
| ?             | ?           | 0_AE003098 | - | 5107    | 9359    | 1-4241    | 4241 | F     | 0  | CTCGTCATCG  | CTGCACCCGC  | TAAAAAATAAAAAAAAAA      | GATTATGGTC |
| 3L            | 76B6-76B    | 0_AE002602 | + | 889533  | 893785  | 1-4241    | 4241 | F     | 0  | CTCGTCATCG  | CTGCACCCGC  | AAAAAAAAAAAAAAAAAAAA    | TGGCGGTGG  |
| 3L            | 75C2-75C1   | 0_AE002602 | - | 1786169 | 1786521 | 831-1183  | 353  | 5'?   | 0  | GAAAACGAC   | TTAAGTCACA  | TTTAAATTCAGGTATGCGCC    | NNNNNNNNN  |
| 3R            | 35E-35F     | 2_AE002708 | + | 412636  | 416892  | 1-4242    | 4242 | F     | 0  | CTCGTCATCG  | CTGCACCCGC  | AAAAAAAAAAAAAAAAAAAA    | GGATAAGAGT |
| 3R            | 88E-88E8    | 2_AE002708 | - | 1394323 | 1398571 | 1-4242    | 4242 | F     | 3  | GCCTGTCAT   | TGCAACCCGC  | AAAAAAAAAAAAAAAAAAAA    | GATGGAAAAG |
| 3R            | 88F-89A5    | 2_AE002708 | - | 1967778 | 1969981 | 1-4237    | 4237 | F     | 0  | TCGTCACTCG  | CTGCACCCGC  | AAAAAAAAAAAAAAAAAAAA    | CTTGAGAAGA |
| 3R            | 88F-89A5    | 2_AE002708 | - | 1972392 | 1972881 | 1-486     | 486  | .3'   | 0  | CTCGTCATCG  | CTGCACCCGC  | AGGACGACTACAGAAAAGTCA   | TGCTGCCCGT |
| 3L            | 62F-63A1    | 0_AE002584 | + | 2726046 | 2730281 | 19-4242   | 4224 | 5'.   | 35 | CAACCAGAG   | GCAATAAAGC  | AAAAAAAAAAAAAAAAAAAA    | CGCCTTATGT |
| ACTCTTCTTCATT |             |            |   |         |         |           |      |       |    |             |             |                         |            |
| 2L            | 36B2-36C2   | 4_AE002690 | - | 243645  | 247893  | 1-4242    | 4242 | F     | 0  | CTCGTCATCG  | CTGCACCCGC  | AAAAAAAAAAAAAAAAAAAA    | TTTTCTTTTG |
| 2L            | 36D1-36D3   | 4_AE002690 | + | 659237  | 663495  | 1-4241    | 4241 | F     | 0  | CTCGTCATCG  | CTGCACCCGC  | AAAAAAAAAAAAAAAAAAAA    | TTTGCAGCTG |
| 2L            | 37D2-37D2   | 4_AE002690 | + | 2322672 | 2323266 | 3641-4237 | 597  | ?     | 0  | NNNNNNNNN   | CTGGCAGGC   | AAAAAAAAAAAAAAAAAAAA    | TTTTTGTCA  |
| 2R            | 37D2-57A4   | 0_AE002787 | - | 36684   | 37120   | 3805-4242 | 438  | ?     | 0  | NNNNNNNNN   | CTCCAGTTAT  | AAAAAAAAAAAAAAAAAAAA    | TTAACCAAT  |
| 2R            | 55A4-54F3   | 0_AE002787 | - | 2626718 | 2630659 | 295-4240  | 3946 | 5'.   | 0  | AAAAGAGCAA  | GATACATTC   | AAAAAAAAAAAAAAAAAAAA    | TTATTGTCTA |
| 3R            | 90A-90A     | 3_AE002708 | - | 580119  | 581791  | 2632-4233 | 1602 | 5'.   | 11 | AACGTAGTGC  | TCCTATACT   | AGTAAAAATAAAAAAAAA      | ATCACTGAA  |
| 3R            | 90B2-90B3   | 3_AE002708 | + | 824831  | 825197  | 3875-4241 | 367  | 5'.   | 11 | CATATATACA  | ATCCCCCGC   | AAAAAAAAAAAAAAAAAAAA    | GACTCGGCGA |
| 3R            | 90C-90D1    | 3_AE002708 | + | 1269456 | 1273201 | 503-4239  | 3737 | 5'.   | 0  | ATTATATATA  | ATATAAAATA  | TAAAAAATAAAAAAAAAA      | GTAGGTTTTT |
| 3R            | 90D6-90E1   | 3_AE002708 | - | 1296039 | 1297562 | 2718-4242 | 1525 | 5'.   | 0  | AAAGACATGT  | AATTTGAATTG | AAAAAAAAAAAAAAAAAAAA    | TCCTTAGGTT |
| 3R            | 91B2-91C7   | 3_AE002708 | - | 1844526 | 1845001 | 88-562    | 475  | 5'?   | 0  | ATACTAACT   | AAATGGTAA   | CAAGGGCTGCAAGTAGTCCT    | NNNNNNNNN  |
| 3R            | 91F11-92A1  | 3_AE002708 | + | 2428825 | 2433081 | 1-4241    | 4241 | F     | 10 | AATTCACATT  | CTGCACCCGC  | AAAAAAAAAAAAAAAAAAAA    | TGACAGTGGG |
| 2L            | 22B-22C1    | 0_AE002638 | + | 2825781 | 2829535 | 503-4242  | 3740 | 5'.   | 0  | ATTATATATA  | ATATAAAATA  | TTTTAAAAAAAAAAAAAAAA    | TTCAACCAAT |
| 2L            | 22A4-22A3   | 1_AE002638 | + | 197798  | 198167  | 3875-4240 | 366  | 5'.   | 0  | CCATCCECC   | AGAACATCA   | AAAAAAAAAAAAAAAAAAAA    | TGCTCTTGTC |
| 2L            | 22A4-22A3   | 1_AE002638 | + | 201768  | 203619  | 1-1845    | 1845 | .3'   | 0  | CTCGTCATCG  | CTGCACCCGC  | CGCTAAACATACTACTTGGG    | GATCGCGACT |
| 2L            | 22A4-22A3   | 1_AE002638 | - | 309929  | 310275  | 3890-4236 | 347  | ?     | 0  | NNNNNNNNN   | GCAACCGTGT  | AAATAAAAAAAAAAAAAAAAAA  | TCTGAACCTG |
| 2L            | 22A4-22A3   | 1_AE002638 | - | 312715  | 313017  | 1403-1702 | 300  | 5'?   | 0  | TTGTTTCTTT  | TGAAATAATAT | TCTATCAACATTCAGCTGGAT   | NNNNNNNNN  |
| ?             | ?           | 0_AE003090 | - | 2916    | 5118    | 1-4236    | 4236 | F     | 0  | TCGTCACTCG  | CTGCACCCGC  | AAATAAAAAAAAAAAAAAAAAA  | TTTTATGACA |
| 3R            | 92D1-92E    | 4_AE002708 | - | 471099  | 474655  | 691-4242  | 3552 | 5'.   | 13 | AAATGTAAAT  | TTGAACCAA   | ATAAAAAAAAAAAAAAAAAA    | AGTAATTTGA |
| 3L            | 79A-79A4    | 0_AE002647 | - | 1296061 | 1296335 | 3964-4238 | 275  | 5'.   | 12 | GTATTCCTTT  | AACTTAAGGA  | AAGTAAAAAAAAAAAAAAAA    | GTGTCGCCGA |
| 3L            | 71A2-71A1   | 1_AE002602 | - | 2310696 | 2310942 | 3985-4231 | 247  | 5'x3' | 11 | CTTTTCATAT  | CACACGCTTC  | GCAAGTAAAAATAAAAAAAAA   | AAAAAAAAT  |
| 3L            | 71A2-70F1   | 1_AE002602 | + | 2454831 | 2456256 | 1469-3245 | 1777 | 5'x3' | 0  | TCAAATGATC  | CTAGCTCAAT  | GCAACACAAACTTCTAAGT     | GGGGGGCCAG |
| 3L            | 71A2-70F1   | 1_AE002602 | - | 2456244 | 2457136 | 867-1757  | 891  | 5'x3' | 0  | CCAATCCTTC  | GTAGCGTCG   | GGCCCCCACTTTAGAAAGTT    | GTGTGTCTT  |
| 3L            | 70E2-70D5   | 1_AE002602 | - | 2754664 | 2754889 | 4011-4234 | 224  | ?     | 0  | NNNNNNNNN   | TAGCGCAGG   | AAAAATAAAAAAAAAAAAAA    | CTATATCCTT |
| ?             | ?           | 0_AE003217 | + | 3057    | 4778    | 371-2350  | 1980 | 5'x3' | 0  | CCAAAGGACA  | AGAGGGTTTG  | AGAGGAACAATACGCTCAGAA   | CCGATGTATA |
| 2R            | 60F1-60F1   | 1_AE002575 | - | 1384285 | 1387090 | 1-2793    | 2793 | .3'   | 0  | CTCGTCATCG  | CTGCACCCGC  | ACCTTATAACACCGGTGTGAT   | AGGTTCAACA |
| ?             | ?           | 0_AE003083 | - | 3561    | 5956    | 1854-4242 | 2389 | 5'.   | 0  | AGTTTTGTTG  | TTGTTGTTCC  | AAAAAAAAAAAAAAAAAAAA    | CCTAAGTGAT |
| ?             | ?           | 0_AE003083 | - | 6239    | 7731    | 2377-4240 | 1864 | 5'.   | 0  | CCCTTGTGTT  | AAGAGACTAA  | AAAAAAAAAAAAAAAAAAAA    | TTCGGTTTCA |
| 3L            | 70D6-70D3   | 2_AE002602 | - | 11779   | 16027   | 1-4242    | 4242 | F     | 0  | CTCGTCATCG  | CTGCACCCGC  | AAAAAAAAAAAAAAAAAAAA    | TATCTGCAT  |
| 3R            | 96C1-96C    | 5_AE002708 | - | 2540088 | 2540680 | 3647-4241 | 595  | ?     | 0  | NNNNNNNNN   | AGCGGGCTCA  | AAAAAAAAAAAAAAAAAAAA    | TCTCGAAT   |
| 3L            | 66A4-2E1    | 4_AE002602 | - | 742104  | 742557  | 3789-4242 | 454  | ?     | 0  | NNNNNNNNN   | CAATCTGGAC  | AAAAAAAAAAAAAAAAAAAA    | ATTGCTTCAA |
| 2L            | 28D5-28D    | 1_AE002690 | + | 62413   | 62899   | 3751-4241 | 491  | ?     | 0  | NNNNNNNCTG  | AGTTCAAAGC  | AAAAAAAAAAAAAAAAAAAA    | CTAAAACAT  |
| ?             | ?           | 0_AE002751 | - | 65332   | 66771   | 163-2565  | 2403 | 5'x3' | 0  | AGACTTGGAA  | GACCGCTACA  | CATAAGGAATTCCTTAAGCGG   | TAGACAGAGC |
| ?             | ?           | 0_AE002700 | - | 8437    | 10687   | 1-2901    | 2901 | .3'   | 0  | TTCCGCCGTTG | CTGCACCCGC  | AAGAGATCGATCTTTAAGCGAT  | CTTAATATCA |
| ?             | ?           | 0_AE002909 | + | 8345    | 9394    | 1-1043    | 1043 | .3'   | 0  | CTCGTCATCG  | CTGCACCCGC  | AGAATGAACCGCGCCGGGGA    | GTACAATCC  |
| ?             | ?           | 0_AE003350 | - | 11424   | 11683   | 3333-3591 | 259  | 5'x3' | 0  | TATAAACATC  | GAGTACTTGG  | TGCCCTTCGATCACTCTGAA    | GCTTAAGGCT |
| 3R            | 84F2-84F6   | 0_AE002708 | + | 493187  | 493972  | 3448-4231 | 784  | 5'x3' | 0  | TGGCAGGGCT  | TATCCAAGCT  | AAGTAAAAATAAAAAAAAAA    | GGGCGGTTG  |
| 2L            | 35B-35B4    | 3_AE002690 | + | 1014543 | 1014955 | 1-411     | 411  | .3'   | 0  | CTCGTCATCG  | CTGCACCCGC  | ATTGGGAAAGATAGTSTAATA   | ATTGTAATGC |
| ?             | ?           | 0_AE002666 | + | 19436   | 19803   | 618-985   | 368  | 5'x3' | 0  | AAGTAAAGCT  | AAGGGCATTG  | CACAGCAAATACAGAGGCTC    | CTTGCTTCTG |
| ?             | ?           | 0_AE002666 | + | 23774   | 23853   | 2882-3246 | 365  | 5'x3' | 0  | TACTTTCAC   | ACGATGGAAG  | AAACCCCAGACTTCTAAGGTC   | AGAAAAGTTG |
| ?             | ?           | 0_AE002837 | + | 29153   | 29441   | 1315-1599 | 285  | 5'x3' | 0  | CGCTCCTCA   | AATGTATAAA  | TCACGGCATGGTAGAGCACA    | TATATCATTA |
| ?             | ?           | 0_AE003199 | + | 19139   | 20460   | 2772-4231 | 1460 | 5'x3' | 6  | CTGGAGTCAA  | ATTCACCTTA  | AAATAAACAATAAAAAAAAA    | TCTGTGCAAG |
| 2L            | 38B5-38C    | 5_AE002690 | + | 257134  | 257503  | 3875-4240 | 366  | 5'.   | 0  | CCATCCECC   | AGAACATCA   | AAAAAAAAAAAAAAAAAAAA    | TGCTCTTGTC |
| 2L            | 38B5-38C    | 5_AE002690 | + | 261104  | 261707  | 1-602     | 602  | .3'   | 0  | CTCGTCATCG  | CTGCACCCGC  | GTTACGCCCGAAGAGATAACT   | TTTTTTTTTT |
| 2R            | 54C-54B     | 1_AE002787 | - | 252102  | 252621  | 3716-4235 | 520  | ?     | 0  | NNNNNNNNN   | CACCTGGCTCA | AAAAATAAAAAAAAAAAAAA    | TTGTTTAGAC |
| ?             | ?           | 0_AE003149 | - | 301     | 785     | 2587-3723 | 1137 | 5'?   | 0  | TTTTATTCTA  | CACCGCCACC  | AAAGCAACTACTTACACTGGC   | Tnnnnnnnn  |
| ?             | ?           | 0_AE002786 | + | 27120   | 27932   | 2874-3689 | 816  | 5'x3' | 0  | CCGAGAGAG   | GATGGAAAAA  | ACATCGAAGTCAAAGAACAC    | GTGGAAAAAC |
| ?             | ?           | 0_AE002992 | + | 8546    | 8788    | 1-244     | 244  | .3'   | 0  | TTCCCGGTTG  | CTGCACCTC   | CAACAATGAAGCGCCCGCAA    | GGACGTGCCA |
| 4             | 102C2-102B  | 0_AE002796 | - | 312513  | 312848  | 3904-4242 | 339  | 5'.   | 0  | AGAACTATCA  | TGGGAACGAA  | ATAAAATCAAAGTTTAAAAA    | AGTTTCGAA  |
| 4             | 102B2-101F  | 0_AE002796 | + | 570822  | 571161  | 3516-3856 | 341  | 5'x3' | 0  | TTCCAGGAT   | TAAAAGAAAA  | CGTAGCGAGCACAACCAAAGT   | TTTTGAGAAT |
| 4             | 101F1-101F1 | 0_AE002796 | + | 688508  | 688761  | 2713-2976 | 264  | 5'x3' | 0  | CTAAATTTT   | TATTGGAATA  | CTAAGATCTGCATACGAAAAT   | CCTGAGTACT |
| ?             | ?           | 0_AE002770 | + | 301     | 758     | 900-1361  | 462  | 5'?   | 0  | AAGATCTCAAT | AAATAATAAA  | ATTCAGACATGATGCGTAAAT   | NNNNNNNNN  |
| ?             | ?           | 0_AE002983 | + | 301     | 439     | 3804-4242 | 439  | ?     | 0  | nnnnnnnnnn  | CTACAGTTAT  | AAAAAAAAATAAAAAAAAAAAAA | AAACTTATAC |
| ?             | ?           | 0_AE003354 | + | 1832    | 2536    | 2984-3724 | 741  | 5'x3' | 0  | nnnnnnnnnn  | AAATCTTCA   | GTCAACAATACACTTGCTC     | GCACGACTTG |
| ?             | ?           | 0_AE003035 | + | 301     | 368     | 3873-4240 | 368  | ?     | 0  | nnnnnnnnnn  | GAGAACCATC  | AAAAAAAAAAAAAAAAAAAA    | TTTCGAAGAA |
| ?             | ?           | 0_AE002760 | - | 43780   | 44706   | 1708-2655 | 948  | 5'x3' | 0  | ACAAGCCGCT  | CAACCGCCTG  | CGAGGCTACTAGCACAATCGC   | AAAAAATAAT |
| ?             | ?           | 0_AE002743 | + | 5740    | 6066    | 1938-2265 | 328  | 5'?   | 0  | CATTCCGTT   | CATCTGGCC   | CAGCTCTTACTCAACACCACA   | NNNNNNNNN  |
| ?             | ?           | 0_AE002743 | - | 81458   | 82065   | 1864-3462 | 1599 | 5'x3' | 0  | TTAAAAAAA   | AAAAATAAAA  | ATCCCAATCCGAGCCAGATC    | CAACCCAGAT |
| ?             | ?           | 0_AE003183 | + | 56390   | 56747   | 503-861   | 359  | 5'x3' | 0  | GAGGAAAC    | ACAGAAAGTT  | CGGTAGTATCTGGAGACCTC    | CACAACCTCA |
| ?             | ?           | 0_AE003163 | - | 12867   | 13300   | 3105-3535 | 431  | 5'x3' | 0  | TTGGCTTGT   | TAGGACCCGC  | ATAAAGTAAACGAGAAAACA    | GACGTTAAAC |
| ?             | ?           | 0_AE003026 | + | 301     | 1164    | 219-1398  | 1180 | 5'x3' | 0  | GGGACCCAT   | TGATCGACAA  | CATACTCGGACCAATCAAT     | GGTACGTTG  |
| ?             | ?           | 0_AE003171 | - | 6674    | 7230    | 1489-4222 | 2734 | ?x3'  | 0  | nCACACAC    | GAAGCATATC  | TAAAGCAATGGTAAAAAAA     | GTTCAATCAG |

|    |           |            |   |        |        |           |     |      |    |            |             |            |                          |             |
|----|-----------|------------|---|--------|--------|-----------|-----|------|----|------------|-------------|------------|--------------------------|-------------|
| ?  | ?         | 0_AE002709 | + | 31996  | 32453  | 2534-3001 | 468 | 5'3' | 0  | GGAATGCGCT |             | AGCGTTTTGT | GAAACATGTCTACTAATTCTGA   | GAGAGAGAGA  |
| ?  | ?         | 0_AE002927 | + | 10745  | 11012  | 3013-3273 | 261 | 5'3' | 0  | AAAGTCTGCT |             | TCTTATTCTA | CTATGACAGCAAGCTTGCAGT    | CACTTCCACT  |
| 2R | 101F1-42B | 0_AE002778 | - | 4528   | 4798   | 3972-4242 | 271 | ?    | 0  | NNNNNNNNNN |             | AAAAATACCA | AAAAAAAAAAAAAAAAAAAAAAAA | TTCAAAATTTA |
| ?  | ?         | 0_AE002642 | + | 12711  | 13013  | 3731-4070 | 340 | ?3'  | 0  | NNNNNNNNNN |             | TCTGGTCTC  | TCCGGCGAAAGGACCTACCTA    | AATAATACAA  |
| ?  | ?         | 0_AE003037 | + | 725    | 1041   | 3907-4224 | 318 | 5'3' | 0  | GGATTAATAA |             | GAAAGAAAAC | AAAAGAAAATTAATAAAAAAAAA  | CTTCTGCTCA  |
| ?  | ?         | 0_AE002736 | + | 2020   | 1941   | 1-222     | 222 | ?    | 0  | CTCGTCATCG |             | CTGCACCCGC | CACGCGACAACCTACCTTGA     | nnnnnnnnnn  |
| ?  | ?         | 0_AE002692 | + | 301    | 217    | 4012-4228 | 217 | ?3'  | 0  | nnnnnnnnnn |             | GCGCGAGGTC | GCAAAGTAAAAAAAAAAAAAAAA  | CGGCCATTCC  |
| 3L | 63B8-63C6 | 1_AE002584 | + | 255932 | 256370 | 3801-4242 | 442 | 5'   | 12 | GCATGGCGAA | AATTAGCAAAG | AAACGGCTCC | AAAAAAAAAAAAAAAAAAAAAAAA | CGAGGCAACA  |
| ?  | ?         | 0_AE002691 | + | 29366  | 29619  | 3970-4220 | 251 | ?3'  | 0  | NNNNNNNNNN |             | GGAAAAATAC | GTAAAAAAAAAAAAAAAAAAAAA  | TATCTCTGTA  |
| ?  | ?         | 0_AE003242 | - | 13139  | 13371  | 3321-3549 | 229 | 5'3' | 0  | GCCGCCCTT  |             | TCCATCAAAG | GCAAAAATGAGAGCATGTAAC    | TGCAACAACA  |

Full-length elements: 2/15  
5' truncated elements: 7/10  
3' truncated elements: 0/9  
5'3' truncated elements: 2/24  
Unfinished elements: 25  
Total number of elements: 94  
Total length of elements: 155644  
TSD lengths (min/max): 0/35

## G

| Chr | Cyt        | Acc        | S | Coordinates | Element | Len       | Type | D    | 5' flank | TSD         | Start     | End         | 3' flank                |             |
|-----|------------|------------|---|-------------|---------|-----------|------|------|----------|-------------|-----------|-------------|-------------------------|-------------|
| 2R  | 60D16-100C | 1_AE002575 | + | 976898      | 978814  | 2456-4346 | 1891 | 5'   | 9        | TTCCGCCAG   | AGCGAGGGA | AAAAAGGCGC  | CACAAAAAAAAAAAAAAAAAAAA | TTACCCCAT   |
| 2R  | 60F1-60F1  | 1_AE002575 | + | 1362746     | 1366567 | 633-4346  | 3714 | 5'   | 0        | CAGCACCCCC  |           | ATCACCCCAA  | CGCTAAAAAAAAAAAAAAAAAAA | CTAAATGAT   |
| 2R  | 60F1-60F1  | 1_AE002575 | + | 1366945     | 1371041 | 1-4343    | 4343 | F    | 8        | ATATGCGTCA  | CTAAATTG  | ACAGTCGCGA  | TCCGTAATAAAAAAAAAAAAAA  | ATGACGAGGT  |
| 2R  | 60F1-60F1  | 1_AE002575 | + | 1371143     | 1374812 | 1-3622    | 3622 | .3'  | 0        | CACTAAATTG  |           | ACAGTCGCGA  | CATCATTCAAAGCCAGCTGCA   | CTTATCGAGG  |
| 2R  | 60F1-60F1  | 1_AE002575 | + | 1374999     | 1375640 | 1-650     | 650  | .3'  | 0        | CACTAAATTG  |           | ACAGTCGCGA  | GGAAATCTGCTCCAAAAACCAT  | TGTTTCGAGTT |
| 3R  | 84E-84E8   | 0_AE002708 | - | 387456      | 390424  | 1334-4345 | 3012 | 5'   | 7        | TTTTATTGTT  | ACTACAG   | AGATGCGCTC  | GGCTACACAAAAAAAAAAAAA   | CTAGTCAATC  |
| ?   | ?          | 0_AE003204 | + | 6277        | 9451    | 885-4281  | 3397 | 5'3' | 0        | GACACGCCCA  |           | ACTGTAAGGG  | ATGTCCTCAATCCAAACACT    | GTCCGAAATG  |
| 2L  | 38B5-38C   | 5_AE002690 | - | 79489       | 79806   | 3088-3412 | 325  | 5'3' | 0        | GGCTTTTATC  |           | TGCTGGAAAT  | TAAAGAGTTTCAAGTCAGATG   | TTAGATAAT   |
| 2L  | 38B5-38C   | 5_AE002690 | - | 85508       | 85995   | 3187-3674 | 488  | 5'3' | 0        | GGGAGGATTT  |           | TCAGGCGATT  | ATCGTGATCAACGCTGATAAA   | AAAAATAGTG  |
| 2L  | 38B5-38C   | 5_AE002690 | + | 86152       | 86691   | 3805-4346 | 542  | 5'   | 0        | AGGAAGCGTA  |           | CCAGGCCAAC  | CTACACAAAAAAAAAAAAAAAA  | CAATTTTTTG  |
| 2L  | 38B5-38C   | 5_AE002690 | - | 124800      | 127295  | 888-4273  | 3386 | 5'3' | 0        | TGGGCATATA  |           | GTCCAGGAAT  | AAGTTAATGCAACCCCCCC     | CCCCCCCCC   |
| X   | 3D5-3D     | 1_AE002566 | - | 363223      | 363454  | 888-1120  | 233  | 5'3' | 0        | TGGGCATATA  |           | GTCCAGGACC  | TCTAGAAACCCGCTGTGTA     | AGAAGTGACA  |
| X   | 3D5-3D     | 1_AE002566 | + | 365430      | 365624  | 2432-2633 | 202  | 5'3' | 0        | TTGAATGTAT  |           | CCAGCAAAT   | AACATAATCTGTTGCAAGTCA   | TATCAGGAGG  |
| X   | 3D5-3D     | 1_AE002566 | - | 365658      | 368318  | 377-4186  | 3810 | 5'3' | 0        | CCCGCACCAA  |           | AGGCCCTACA  | GCCTGCAGATAACGCACCCGC   | ACCCGCGAGG  |
| X   | 3D5-3D     | 1_AE002566 | - | 368925      | 371275  | 377-2726  | 2350 | 5'3' | 0        | CCCGCACCAA  |           | AGGCCCTACA  | AAGCCGAAAGAGCTGAAGCGT   | TTTTTTTGA   |
| X   | 3D5-3D     | 1_AE002566 | - | 371876      | 373848  | 377-2726  | 2350 | 5'3' | 0        | CCCGCACCAA  |           | AGGCCCTACA  | AAGCCGAAAGAGCTGAAGCGT   | TTTTTTTGA   |
| X   | 3D5-3D     | 1_AE002566 | - | 374207      | 374726  | 888-1409  | 522  | 5'3' | 0        | TGGGCATATA  |           | GTCCAGGACC  | GAATCCCGAGCTCCTGTTGA    | TGGCGGAATA  |
| 2L  | 32F2-33A1  | 2_AE002690 | + | 351325      | 353688  | 2011-4346 | 2336 | 5'   | 0        | AAACAGCGCC  |           | CCAGCAGAGC  | AAAAAAAAAAAAAAAAAAAAAAA | TTTTTTCCCG  |
| 2L  | 34D4-34D4  | 2_AE002690 | - | 2635507     | 2636637 | 3237-4346 | 1110 | 5'   | 0        | TCCCATCTCT  |           | ATTTTGAAT   | AAAAAAAAAAAAAAAAAAAAAAA | CATACATATA  |
| ?   | ?          | 0_AE002837 | - | 50563       | 52096   | 2838-4346 | 1509 | 5'   | 0        | GAGTCCATGT  |           | CTCCTAGCCC  | AAAAAAAAAAAAAAAAAAAAAAA | CCAATATTTT  |
| ?   | ?          | 0_AE002837 | - | 57520       | 57991   | 1658-2161 | 504  | 5'3' | 0        | GCCTTTGGAA  |           | CCGAGATCCA  | AGCGCAGTAAGCATGCTCTTA   | AACATCCCGC  |
| ?   | ?          | 0_AE003213 | - | 3502        | 3923    | 1298-1722 | 425  | 5'3' | 0        | GGACATGTTA  |           | CTCCGCGCAG  | AAACCCCTTCCGCGCAGAG     | AGCAATCCTC  |
| ?   | ?          | 0_AE003213 | - | 10650       | 12528   | 1823-4339 | 2517 | 5'   | 0        | TTATTTTTC   |           | ATCCTTCAGG  | ATGAAGTTTACAACAAAAAAA   | TTTATATATG  |
| ?   | ?          | 0_AE002938 | - | 301         | 480     | 2093-2498 | 406  | 5'3' | 0        | GACTTCAACG  |           | CTGGATTTTG  | ATCTGGTTCTTCTCGCGAAA    | CGTCGAGAAG  |
| ?   | ?          | 0_AE002938 | + | 4560        | 4930    | 3969-4341 | 373  | 5'   | 0        | TTTGTG'FAGC |           | AGCGATTTCA  | AAAGGCTACACAAAAAAA      | CCCCATTTGT  |
| ?   | ?          | 0_AE002938 | + | 6177        | 6544    | 3969-4340 | 372  | 5'   | 0        | TTTGTG'FAGC |           | AGCGATTTCA  | AAAAGGCTACACAAAAAAA     | CCCCATTTGT  |
| ?   | ?          | 0_AE002938 | - | 9703        | 9936    | 888-1120  | 233  | 5'3' | 0        | TGGGCATATA  |           | GTCCAGGACC  | TCTAGAAACCCGCTGTGTA     | ACACCCGAGC  |
| ?   | ?          | 0_AE002772 | + | 7084        | 8632    | 1152-3396 | 2245 | 5'3' | 0        | GACCATAAAA  |           | GAAAAAAAGG  | AATCCTTAAAGGAGGTAGAG    | CTTCTCGCG   |
| 3L  | 78C9-78A   | 0_AE002647 | + | 1020493     | 1021392 | 3468-4346 | 879  | 5'   | 0        | AAATACTTTT  |           | GTCTTTGGTC  | CAAAAAAAAAAAAAAAAAAAAA  | TTCTAAAAC   |
| 2L  | 38A1-38A1  | 4_AE002690 | + | 2648729     | 2649219 | 3855-4346 | 492  | 5'   | 0        | TCCACTGGCT  |           | CCAAGCTGCG  | CTACAAAAAAAAAAAAAAAAAAA | CAATTTTTTG  |
| 2R  | 38A1-42B   | 0_AE002778 | + | 301         | 625     | 1357-4346 | 2990 | ?    | 0        | nnnnnnnnn   |           | ACGCAGCACC  | AAAAAAAAAAAAAAAAAAAAAAA | CTGTACTCTG  |
| 2R  | 41F11-41C  | 0_AE002769 | - | 1123417     | 1123627 | 4037-4248 | 212  | 5'3' | 0        | CTTATAACCA  |           | AGAAAGAAT   | AAAATACAGTACTTCTTATT    | TTATTATTAT  |
| ?   | ?          | 0_AE003021 | + | 21336       | 22057   | 934-1753  | 820  | 5'3' | 0        | TTGGCAGGAA  |           | TAGGGATATT  | GCAGCCATGCTCATCAGGAGC   | AAGTGGCAAG  |
| ?   | ?          | 0_AE002712 | - | 2049        | 2361    | 4013-4337 | 325  | 5'   | 0        | CAACAGCAAG  |           | CATGCAATTA  | AAACGCACGCTCAAAAAAAA    | GTAGTATAGG  |
| ?   | ?          | 0_AE003024 | - | 58479       | 58755   | 1450-4346 | 2897 | 5'   | 0        | GGAAAGGAAT  |           | TGGAAAGGAT  | CAAAAAAAAAAAAAAAAAAAAA  | ATTTTGTCCG  |
| ?   | ?          | 0_AE003383 | + | 2982        | 2926    | 2040-2283 | 244  | 5'?  | 0        | AGAAATGATT  |           | CAATTTGGGAG | ACTCTGGACGCTCTCTCTCT    | Gnnnnnnnnn  |
| ?   | ?          | 0_AE003092 | + | 301         | 296     | 4048-4346 | 299  | ?    | 0        | nnnnnnnnn   |           | GGATTCATGG  | GGCTACAAAAAAAAAAAAAAAA  | GAAACAGAAA  |

Full-length elements: 1/0  
5' truncated elements: 2/12  
3' truncated elements: 0/2  
5'3' truncated elements: 0/17  
Unfinished elements: 3  
Total number of elements: 37  
Total length of elements: 56025  
TSD lengths (min/max): 7/9

## Idm

| Chr | Cyt      | Acc        | S | Coordinates | Element | Len    | Type | D | 5' flank | TSD        | Start         | End        | 3' flank             |            |
|-----|----------|------------|---|-------------|---------|--------|------|---|----------|------------|---------------|------------|----------------------|------------|
| 3R  | 98B8-98B | 6_AE002708 | + | 1937821     | 1943206 | 1-5374 | 5374 | F | 13       | TCTGTATTAT | ATATTCTATTTAT | CAGTACCACC | TCATAATAATAATAATAATA | GGGCAAAATA |

|    |             |   |          |   |         |         |           |      |         |    |             |                    |             |                        |             |
|----|-------------|---|----------|---|---------|---------|-----------|------|---------|----|-------------|--------------------|-------------|------------------------|-------------|
| 3R | 98B-98C     | 6 | AE002708 | - | 2277574 | 2282959 | 1-5374    | 5374 | F       | 12 | TTTTAAAAAC  | ACAAACCAAACG       | TCAGTACCAC  | TCATAATAATAATAATAATA   | AGTAAATCTC  |
| X  | 11A4-11A6   | 0 | AE002593 | + | 1371575 | 1376962 | 1-5374    | 5374 | F       | 17 | GGGCAATGGA  | AAATATTTCTAATGTACA | GTACCACATTC | ATCATAATAATAATAATAAT   | AAGTCTGTTG  |
| X  | 19F-19B3    | 0 | AE002620 | + | 544610  | 549995  | 1-5374    | 5374 | F       | 16 | AATCATGATA  | AATAATACAAGGGCTG   | GCAGTACCAC  | TCATATAATAATAATAAAT    | TGAATCTATA  |
| X  | 4F10-5A6    | 1 | AE002566 | + | 2290140 | 2294096 | 1424-5374 | 3951 | 5' .    | 13 | TTGTTGAGCA  | ATCTTAGTAATGA      | CCTAACCGTT  | AATAAATAAAAAAAAAAAAA   | ATATATGGGC  |
| 2L | 23A2-22A1   | 0 | AE002638 | - | 2279164 | 2280940 | 3604-5374 | 1771 | 5' .    | 11 | TTTATTTGCT  | ATATTTTCATGC       | ATCGACGATA  | TCATAATAATAATAATAATA   | CTGGCTGCAC  |
| X  | 2B-2B6      | 0 | AE002566 | - | 1322872 | 1324609 | 3641-5374 | 1734 | 5' .    | 11 | GGGTCAATTT  | ATATTTAAATAT       | CCTATCCCTA  | TCATAATAATAATAATAATA   | CATGTATTTTC |
| 4  | 101F1-101F1 | 0 | AE002796 | - | 708395  | 708687  | 5082-5374 | 293  | ?       | 0  | NNNNNNNNNN  |                    | CAAGATATAT  | CATAATAATAATAATAATAA   | TACAGTGATCA |
| 4  | 101F1-101F1 | 0 | AE002796 | - | 713552  | 714000  | 1-449     | 449  | ?       | 0  | GTGATCAATT  |                    | CAGTACCAC   | CTAACAAAAATTGCAGATGA   | NNNNNNNNNN  |
| 3L | 78C9-78A    | 0 | AE002647 | - | 1024609 | 1029997 | 1-5374    | 5374 | F       | 14 | TAACCTTTAC  | ATTTGCTTGCATTC     | ATTCAGTACC  | TCATAATAATAATAATAATA   | TCAGTATCA   |
| X  | 12C1-12D1   | 1 | AE002593 | - | 134666  | 137893  | 2159-5374 | 3216 | 5' .    | 9  | AGCCAGAAAT  | ATAAATAAC          | AACACTATTTC | TCATAATAATAATAATAATA   | TGATGGTTT   |
| X  | 12F1-12F1   | 1 | AE002593 | - | 815649  | 821037  | 1-5374    | 5374 | F       | 14 | AGTTTCCATT  | TAGTTTGTGTATT      | CAGTACCAC   | TATCATAATAATAATAATAA   | GCCATGCTCA  |
| ?  | ?           | 0 | AE003041 | - | 7817    | 9675    | 3505-5374 | 1870 | 5' .    | 0  | TTGACATTTA  |                    | TTCAAAATTC  | CATAATAATAATAATAATAA   | AAAACAGAGGA |
| ?  | ?           | 0 | AE003172 | + | 301     | 1983    | 708-2385  | 1678 | 2' .    | 0  | nnnnnnnnnA  |                    | ACAGTCCGAG  | GAACAACCTTGCCTGATAAA   | ATTAAGCCGC  |
| ?  | ?           | 0 | AE003173 | - | 3282    | 3966    | 4687-5374 | 688  | 5' .    | 0  | TGCACCTAAA  |                    | ATTAAGGAAT  | CATAATAATAATAATAATAA   | ATCTTCAACG  |
| ?  | ?           | 0 | AE002862 | - | 301     | 1011    | 1376-2445 | 1070 | ?       | ?  | nnnnnnnGAG  |                    | ATAATCTATC  | AACAAAAAACAACCTTGCCTGG | Ammmmmmmm   |
| 3L | 66E2-66D14  | 3 | AE002602 | - | 2462695 | 2463202 | 4867-5374 | 508  | ?       | 0  | NNNNNNNNNN  |                    | CGAACACCTC  | TATCATAATAATAATAATAA   | TTAACCCATT  |
| 3L | 66E2-66D14  | 3 | AE002602 | - | 2467763 | 2468082 | 1-320     | 320  | ?       | 0  | AACCCATTCT  |                    | CAGTACCAC   | TCACCATTATCATATAAAAA   | TTNNNNNNNN  |
| ?  | ?           | 0 | AE002809 | - | 20213   | 20409   | 3423-3624 | 202  | 5' 3' . | 0  | TGAAGTTGGT  |                    | TTACAGTAAAC | TACAATATGCAAGAAATATGT  | AAGAAATGTA  |
| 3R | 86A-86B1    | 0 | AE002708 | - | 2525553 | 2526062 | 1487-2000 | 514  | 2' .    | 0  | NNNNNNNNCT  |                    | ACCGTTACAC  | AAAAGACTCAAAAAATGAAT   | CTAAAGCTAA  |
| 3R | 86A-86B1    | 0 | AE002708 | + | 2530283 | 2530563 | 5096-5374 | 279  | ?       | 0  | NNNNNNNNNN  |                    | CAACACCAAC  | TCATAATAATAATAATAATAA  | AATAAACAATA |
| 2R | 42A2-41F9   | 0 | AE002769 | + | 289211  | 289417  | 5167-5373 | 207  | 5' .    | 6  | TATAAAGTAT  | ATAAAAT            | TAAAAAAATTA | TATTCATCTATATAATAAA    | ATTCTGTACT  |
| 2R | 42A2-41F9   | 0 | AE002769 | + | 305400  | 305955  | 4810-5372 | 563  | 5' .    | 0  | TTTCGGGGCC  |                    | CGAAACAATAT | TATACAGCAAAAGACCAAA    | CTAAAAACT   |
| 2R | 41F11-41C   | 0 | AE002769 | - | 978283  | 978658  | 1-383     | 383  | ?' .    | 0  | TGCAAAACAA  |                    | CAGTACCAC   | CGAACAGAGACGGCAACTC    | AAGACCGTCT  |
| ?  | ?           | 0 | AE003402 | + | 301     | 554     | 2807-3358 | 552  | 2' .    | 0  | nnnnnnnnnA  |                    | ATAGCCCAAA  | ACTAAAGCCACTCTAAAAA    | GAGGCTTGTA  |
| 2R | 44D-44C1    | 4 | AE002787 | - | 264761  | 265492  | 4642-5373 | 732  | 5' .    | 0  | AAAAAAGGG   |                    | TAAACAATA   | ACGAGAAATTTTATGAAAGTA  | TTAAACTTAA  |
| 3L | 64C11-64C9  | 5 | AE002602 | + | 67546   | 67916   | 5004-5374 | 371  | ?       | 0  | NNNNNNNNNN  |                    | CCAACCTGCC  | TATCATAATAATAATAATAA   | TAATTTCTTT  |
| 2L | 39C3-?      | 5 | AE002690 | - | 1341063 | 1341421 | 1544-1908 | 365  | 5' 3' . | 0  | GTTGTATTAC  |                    | AACGATGGAC  | CAATTAATATACAACAACA    | TGTAGGGGTA  |
| ?  | ?           | 0 | AE003036 | - | 2667    | 3082    | 1555-1970 | 416  | 2' .    | 0  | NNNNNNNNAT  |                    | AATCCAATT   | AGGGCTCACCAACAACAAAT   | TTTTTAAACA  |
| ?  | ?           | 0 | AE003307 | + | 12927   | 13016   | 33-398    | 366  | 5' 3' . | 0  | TCTCGGTTCA  |                    | GTACTACCCA  | TGACCATCAACACAGCCCAA   | TTGACCGCAA  |
| ?  | ?           | 0 | AE003055 | - | 1713    | 2027    | 2548-2865 | 318  | 5' 3' . | 0  | TCCAAATATG  |                    | CGCGTTTATT  | TTATTGCCATATACCACAA    | ACAAGGCCAA  |
| ?  | ?           | 0 | AE002736 | + | 301     | 326     | 5052-5374 | 323  | ?       | 0  | nnnnnnnnnA  |                    | ACTCATGGCC  | CATAATAATAATAATAATAA   | AACGCAATA   |
| ?  | ?           | 0 | AE003023 | - | 301     | 248     | 4917-5165 | 249  | 5' ?    | 0  | GAATCCCTCA  |                    | ACCACATGGC  | CAAAAATCATACTTTTCCT    | Cmmmmmmmm   |
| ?  | ?           | 0 | AE002631 | - | 1699    | 1702    | 5077-5374 | 298  | ?       | 0  | nnnnnnnnnn  |                    | CCAAACAAGA  | TATAAAAAAAAAAAAAAAAAA  | TTATAAAAITT |
| ?  | ?           | 0 | AE003220 | - | 301     | 320     | 4789-5104 | 316  | 5' ?    | 0  | AATTCACCTGT |                    | AAACAGTTAGG | AGACATATTTTAAACAACA    | Annnnnnnnn  |
| 3R | 87F2-50D    | 1 | AE002708 | + | 2606054 | 2606376 | 853-1175  | 323  | 5' 3' . | 0  | CTAATTTGTA  |                    | ACA AACGAAA | CAAACTCCGAGACTACACAC   | CACCATAGGT  |
| 2L | 21B7-21B3   | 1 | AE002638 | + | 1689760 | 1689981 | 5153-5374 | 222  | 5' .    | 0  | TTCTCAGTTA  |                    | CATACATTAT  | CATAATAATAATAATAATAA   | ATAATTAAAC  |
| 4  | 102A-101F   | 0 | AE002796 | - | 642597  | 643877  | 4059-5374 | 1316 | 5' .    | 0  | ACATATTTTA  |                    | AATACTCCCT  | TATTCATCTATATAATAAA    | AATAATAACT  |
| 4  | 102A-101F   | 0 | AE002796 | - | 645198  | 646803  | 2017-3720 | 1704 | 5' 3' . | 0  | TAGTTGAGAT  |                    | TCCTCAAAC   | CAAGATAAGCTGCAACAAT    | GGAACGAAGT  |
| 3L | 102A-77B3   | 0 | AE002647 | - | 3408    | 4510    | 36-1176   | 1141 | 5' 3' . | 0  | TCCGAAGCC   |                    | CCACCAGTT   | TTCCAGCCGATCAAAACTCT   | GTATAGTTAG  |
| ?  | ?           | 0 | AE002918 | - | 14117   | 16217   | 1-2169    | 2169 | ?' .    | 0  | ACATTTACAT  |                    | CAGTACCAC   | CTCCTCGCCCATTTGCTCTAA  | TTGTGGCAAC  |
| ?  | ?           | 0 | AE003173 | - | 5427    | 6586    | 61-1286   | 1226 | 5' 3' . | 0  | AGTCTTACTA  |                    | CGTGCACAC   | TAGAAGACATGGATAAATAA   | AAAACGCAAA  |
| ?  | ?           | 0 | AE002931 | - | 11437   | 14039   | 1422-4261 | 2840 | 5' 3' . | 0  | ACCAACATTT  |                    | CTACAACCTC  | GAACTCCTTTTCCCTTAACC   | TTTTCCCTCC  |
| ?  | ?           | 0 | AE002809 | - | 11236   | 12713   | 3501-5374 | 1874 | 5' .    | 0  | TAACCGTGGC  |                    | TGCGTGCAGC  | TTGTCTATAATAATAATAAA   | ATATTTATTT  |
| ?  | ?           | 0 | AE003063 | + | 6436    | 7529    | 4241-5371 | 1131 | 5' .    | 0  | ACTTGAACC   |                    | AAAACCTCAT  | CTATCATATAATAATAATAA   | ATCTCACATA  |
| 2R | 46A-46B1    | 3 | AE002787 | - | 1958743 | 1958845 | 36-1176   | 1141 | 5' 3' . | 0  | TCCGAAGCC   |                    | CCACCAGTT   | TTCCAGCCCATCAAAACTCT   | GTATAGTTAG  |
| ?  | ?           | 0 | AE003181 | + | 12276   | 13376   | 4830-5369 | 540  | 5' .    | 8  | ATTATATTAT  | ATAAACA            | GCAGTCCATG  | TCTATCTATCATATAATAA    | TGTCTCTCT   |
| ?  | ?           | 0 | AE002603 | + | 43577   | 44184   | 3056-3698 | 643  | 5' 3' . | 0  | AACAACTCTGA |                    | ACACCAAAAC  | GTTCCTATCGTTACTTCAA    | AAATTTTTAGG |

Full-length elements: 6/0  
5' truncated elements: 6/8  
3' truncated elements: 0/2  
5'3' truncated elements: 0/11  
Unfinished elements: 15  
Total number of elements: 48  
Total length of elements: 72516  
TSD lengths (min/max): 6/17

### Jockey

| Chr | Cyt       | Acc | S        | Coordinates | Element | Len     | Type      | D    | 5' flank | TSD | Start       | End             | 3' flank    |            |
|-----|-----------|-----|----------|-------------|---------|---------|-----------|------|----------|-----|-------------|-----------------|-------------|------------|
| 2L  | 25A8-25A5 | 0   | AE002638 | +           | 15360   | 20359   | 1-5049    | 5049 | F        | 12  | AAGAGCAAGT  | AAGATTTGCATT    | CAITTCGCATG | GCATACTTTT |
| X   | 20A5-20   | 0   | AE002629 | -           | 399726  | 404726  | 1-5049    | 5049 | F        | 15  | CTAGACTCTT  | ATACAGAGGTGGTCA | CATTTCGCATG | AAAGTATTTA |
| 2R  | 43B2-43B1 | 4   | AE002787 | -           | 1434026 | 1439023 | 1-5047    | 5047 | F        | 13  | TTTTGCCATG  | TCTTCCGAGCCAG   | TCGCATGGGA  | AGCAGAAAT  |
| 3L  | 65A-64F   | 4   | AE002602 | +           | 2233035 | 2235616 | 1-5048    | 5048 | F        | 10  | TTCAGTATTA  | AAGGAATAAC      | ACAGTCGCATG | GACTTTATCC |
| 3L  | 64E-64D   | 4   | AE002602 | +           | 2698807 | 2699057 | 4791-5049 | 259  | 5' .     | 11  | TTAATGTTTT  | ACTGTTATGGT     | ACACACCCTC  | TACTGTACAA |
| 2L  | 30A8-30B  | 1   | AE002690 | -           | 1440270 | 1443165 | 2114-5049 | 2936 | 5' .     | 3   | TTTACTTGTT  | ACA             | GGATATTCCT  | GTGCTAATGA |
| 3R  | 87F2-50D  | 1   | AE002708 | -           | 2747838 | 2751352 | 2286-5049 | 2764 | 5' .     | 12  | AAAAAGCCATC | ATACTTTGTGATT   | CTGCACCTA   | ATGCTTTTTT |
| 3L  | 69F6-69D  | 2   | AE002602 | +           | 1387337 | 1389607 | 2746-5049 | 2304 | 5' .     | 0   | TTCTAATAAA  |                 | ACATACCAA   | TGCTTTAAGT |
| 3L  | 68C5-68A8 | 2   | AE002602 | -           | 2928345 | 2931504 | 1852-5049 | 3198 | 5' .     | 13  | TGTGGTTTAT  | AATCATTAAAGAGT  | AAATTTAAACA | GACCGTCGTT |
| 2R  | 56F9-56E  | 0   | AE002787 | -           | 1000761 | 1003994 | 1777-5049 | 3273 | 5' .     | 12  | TCGCTCATGA  | AGAAATCATGAT    | CATACCAGCT  | GCCGAAATGG |
| 2R  | 55E4-55C  | 0   | AE002787 | +           | 2381230 | 2381775 | 1-554     | 554  | ?        | 0   | AATAGTTCCA  |                 | GGGAGATGAG  | NNNNNNNNNN |
| 2R  | 55E4-55C  | 0   | AE002787 | +           | 2383635 | 2383854 | 4821-5049 | 229  | ?        | 0   | NNNNNNNNNN  |                 | TTTTGCCTAGA | GGACAACTAG |
| 2R  | 55A4-54F3 | 0   | AE002787 | -           | 2696250 | 2696501 | 4790-5049 | 260  | 5' .     | 13  | TCCAGCAATC  | ATATAAAGTTAGC   | ACACCACCTC  | AGTTGTAATC |
| 2R  | 58D1-58D6 | 0   | AE002575 | -           | 1569356 | 1571075 | 3291-5049 | 1759 | 5' .     | 10  | GCCACAGACG  | ACACACATGG      | ATACTTGGAA  | GACCCCAATA |
| 2R  | 58D1-58D6 | 0   | AE002575 | +           | 1580018 | 1580360 | 4694-5049 | 356  | 5' .     | 8   | CTCAGTGTGG  | AAATTTACA       | TTTTACACCC  | TCCGTTTCGG |
| 2R  | 58E4-58E4 | 0   | AE002575 | -           | 1745421 | 1748885 | 1546-5049 | 3504 | 5' .     | 11  | GAATCGTGT   | ACCCTTATGTC     | TGCGCCGAGG  | GACTCGGGTT |

|    |             |            |   |         |         |           |      |     |    |             |                  |                       |                        |             |
|----|-------------|------------|---|---------|---------|-----------|------|-----|----|-------------|------------------|-----------------------|------------------------|-------------|
| 2R | 59A-59B1    | 0_AE002575 | + | 1994639 | 1994979 | 4696-5049 | 354  | 5'  | 14 | TTTCCTAGCT  | TTAAGAGCTGAGCA   | CCCCAACAGC            | CATCAAAGAAAAAAAAAAAA   | TATCGATTTA  |
| 3R | 85A11-85B9  | 0_AE002708 | - | 995194  | 997370  | 1-2190    | 2190 | .3' | 0  | CATGGTCGCA  |                  | GGGAGATGAG            | TTACTATGTATCAACTAT     | TATAAITCTC  |
| 3R | 85D2-85D10  | 0_AE002708 | - | 1601649 | 1601987 | 4696-5047 | 352  | 5'  | 11 | TCTGGCTTTC  | ATTATGACCGT      | GTACACCCCA            | AAAAAAAAAAAAAAAAAAAA   | AANTACTGTCA |
| 2L | 22A4-22A3   | 1_AE002638 | + | 264926  | 265175  | 4792-5049 | 258  | 5'  | 13 | TTGCCTGGCC  | TTGCTTTTCTCTT    | CACCACCCTC            | CATCATCGTAATCGTAAAA    | TCCGGTTTGT  |
| 2L | 21B5-21A3   | 1_AE002638 | + | 1813836 | 1818834 | 1-5049    | 5049 | F   | 12 | AAAAACGAAAC | ATATTGAAAAGC     | ATTTCGATGG            | AAAAAAAAAAAAAAAAAAAA   | GAAAACAGGA  |
| 2R | 50C2-50A12  | 2_AE002787 | + | 1138779 | 1139028 | 4792-5049 | 258  | 5'  | 12 | TCACAGATGC  | ATTGATAATATT     | CACCACCCTC            | AAAAAAAAAAAAAAAAAAAA   | GCCTAGGCTT  |
| 2R | 49D6-49D1   | 2_AE002787 | - | 1900367 | 1905364 | 1-5049    | 5049 | F   | 13 | AAATCCTTTGG | AGACACACACACA    | TTTCGATGGG            | AAAAAAAAACATCATATAAAA  | GCACACAAAA  |
| 3R | 84A2-?      | 0_AE002699 | - | 1182956 | 1187975 | 1-5049    | 5049 | F   | 11 | AAAGCCGGCT  | GTGGTTACACT      | CATTTCGATG            | ATCATCGAAAAAAAAAAAAA   | GCTTAAGTGA  |
| X  | 4D3-4B1     | 1_AE002566 | - | 1510089 | 1510348 | 4782-5049 | 268  | 5'  | 10 | TTTTGTTTATT | ACTGTCTGCA       | CACCACCCTC            | AAAAAAAAAAAAAAAAAAAA   | GTTTCTACAA  |
| X  | 4D3-4E1     | 1_AE002566 | - | 1541460 | 1546459 | 1-5049    | 5049 | F   | 12 | TTTTATCTAGT | GTACATTTTATT     | TTCATTGCGA            | AAAAAAAAAAAAAAAAAAAA   | GGCTAATCTG  |
| X  | 4D3-4E1     | 1_AE002566 | - | 1601547 | 1601894 | 4691-5049 | 359  | 5'  | 13 | TTTTCCGTTCT | CTTAAATGTGAAT    | CCCCAACAGC            | AAAAAAAAAAAAAAAAAAAA   | GCATAATAT   |
| X  | 4F10-5A6    | 1_AE002566 | - | 2148304 | 2149457 | 3863-5049 | 1187 | 5'  | 13 | TTTTCCGTTCT | TGTATTTGAGAGCG   | GCTGTTCGCG            | AAAAAAAAAAAAAAAAAAAA   | AAGAACCCTC  |
| X  | 7A-7B3      | 2_AE002566 | - | 1284674 | 1286092 | 3598-5049 | 1452 | 5'  | 10 | TTTTGTCTGT  | ACATTAGCGA       | TGCCCATCAG            | GACAAAAAAAAAAAAAAAAA   | CGCATCCGAC  |
| X  | 7A-7B3      | 2_AE002566 | + | 1506150 | 1506489 | 4696-5048 | 353  | 5'  | 14 | CAATCCGGAT  | ATCAGTTTGTAECT   | TGTACACCCC            | AAAAAAAAAAAAAAAAAAAA   | GCTAGAATC   |
| X  | 7B3-7C3     | 2_AE002566 | - | 1587519 | 1587768 | 4786-5044 | 259  | 5'  | 11 | ACTCCATCTT  | ATGGAATATGC      | TTTTGACCTAG           | AAAAAAAAAAAAAAAAAAAA   | AGCAGTTTCC  |
| X  | 8B-8A5      | 2_AE002566 | + | 2716702 | 2717041 | 4697-5049 | 353  | 5'  | 9  | GCTATTGTCG  | ATCAATTTGG       | AGTACACCCC            | AAAAAAAAAAAAAAAAAAAA   | TAGCATTTCAC |
| 3R | 97B-97D1    | 6_AE002708 | + | 853770  | 854071  | 4737-5049 | 313  | 5'  | 12 | GGGTATACGC  | ATGTTGTCAACT     | TGGTCAATCG            | AAAAAAAAAAAAAAAAAAAA   | GGTGGGCAG   |
| 3R | 98B-98C     | 6_AE002708 | + | 2462170 | 2465119 | 1-5049    | 5049 | F   | 12 | CATCTGGCTT  | AAAATATTTCAC     | ATTTCCGATGG           | AAAAAAAAAAAAAAAAAAAA   | CTTCTTCGG   |
| 3R | 98C-98D     | 6_AE002708 | - | 2511503 | 2511842 | 4697-5049 | 353  | 5'  | 15 | ATGTACACGT  | AGSTAAAAAGAAGTC  | GTACACCCCC            | AAAAAAAAAAAAAAAAAAAA   | ATTTTGTGTG  |
| 3R | 98E2-98E    | 6_AE002708 | + | 2989759 | 2990342 | 1-594     | 594  | ?   | 0  | ACCCGAAATA  |                  | GGGAGATGAG            | CAACATGATCTGACTCTACA   | ANNNNNNNNN  |
| 3R | 98E2-98E    | 6_AE002708 | + | 2994173 | 2994423 | 4791-5049 | 259  | ?   | 0  | NNNNNNNNNN  |                  | ACACCACCCT            | AAAAAAAAAAAAAAAAAAAA   | CCCGCAATA   |
| 3R | 35F-8B1     | 2_AE002708 | + | 477783  | 479194  | 3606-5049 | 1444 | 5'  | 11 | GGCTGTGCTT  | CCAGCTGTGCC      | GCTGTGCTCTG           | AAAAAAAAAAAAAAAAAAAA   | GACAGCGCCG  |
| 3R | 99A6-99B5   | 7_AE002708 | + | 516094  | 516344  | 4791-5049 | 259  | 5'  | 0  | TTGTTACTCT  |                  | AAACACCCTC            | TCAAATAATAAACATCATC    | GTAAATCGTTA |
| 3R | 99A6-99B5   | 7_AE002708 | + | 603004  | 604199  | 3821-5049 | 1229 | 5'  | 13 | TATCATATTG  | ACGCTGCGTGGGA    | TTGACAGAGT            | CCAGCGCGCGTCAAGATA     | ACCACAAAGC  |
| 3R | 99B5-99B9   | 7_AE002708 | - | 849523  | 850001  | 1861-5049 | 3189 | ?   | 0  | NNNNNNNNNN  |                  | TGTGCAGGCT            | TAAAAAAAAAAAAAAAAAAAA  | CAGAGCCTTT  |
| 3R | 99B5-99B9   | 7_AE002708 | - | 851043  | 851635  | 1-601     | 601  | ?   | 0  | TTGAGTCCGNA |                  | GGGAGATGAG            | CTTGGACTCCTACATACACTG  | NNNNNNNNNN  |
| 3R | 99F11-99F6  | 7_AE002708 | - | 1669332 | 1669663 | 4704-5048 | 345  | ?   | 0  | NNNNNNNNNN  |                  | CCAACAGCCT            | AAAAAAAAAAAAAAAAAAAA   | TGAATTTCTT  |
| 3R | 99F11-99F6  | 7_AE002708 | - | 1671104 | 1671637 | 1-540     | 540  | ?   | 0  | TTACTCCGCA  |                  | GGGAGATGAG            | CAGCAGCAACCAATGCAG     | NNNNNNNNNN  |
| 3L | 67C-69      | 3_AE002602 | + | 1679238 | 1679701 | 1-470     | 470  | ?   | 0  | TATAGTCGCA  |                  | GGGAGATGAG            | GTCAGTTTGTTCCTCCTAAC   | NNNNNNNNNN  |
| 3L | 67C-69      | 3_AE002602 | + | 1684039 | 1684340 | 4737-5047 | 311  | ?   | 0  | NNNNNNNNNN  |                  | CAGCTGTGGT            | ACATCAAAAAAAAAAAAAA    | TGTACATATA  |
| 3L | 67C-69      | 3_AE002602 | + | 1688080 | 1688328 | 4793-5049 | 257  | 5'  | 14 | TTATTTACTT  | ACACTATACCTTAC   | CACCCCTCATG           | AAAAAAAAAAAAAAAAAAAA   | ATTTGCGGAT  |
| 3L | 67A-66F5    | 3_AE002602 | + | 2040451 | 2041057 | 4428-5049 | 622  | 5'  | 15 | TGCAGCTGCC  | ACTATGTCTATTCCTT | GTCCATATTG            | AAAAAAAAAAAAAAAAAAAA   | AGTTTTCCTC  |
| X  | 12A-12A3    | 0_AE002593 | + | 2625065 | 2626133 | 3946-5049 | 1104 | 5'  | 0  | GTCATGGCA   |                  | AGAATCTCG             | AAAAAAAAAAAAAAAAAAAA   | GGATGAAAA   |
| X  | 12A-12A3    | 0_AE002593 | + | 2626347 | 2626925 | 4454-5048 | 595  | 5'  | 0  | ACCTGAATAT  |                  | TCCAAGTGCA            | AAAAAAAAAAAAAAAAAAAA   | CGCTCTTAAC  |
| 2L | 38A1-38A1   | 4_AE002690 | + | 2586207 | 2587103 | 4121-5048 | 928  | 5'  | 11 | TTTTCCGTTGG | TAGACCATGGC      | AGTAAAAGTA            | AAAAAAAAAAAAAAAAAAAA   | GACCACTGCT  |
| 3L | 61D2-61E    | 0_AE002584 | - | 919237  | 920285  | 3951-5049 | 1099 | 5'  | 13 | CTGAAATTTT  | ATGCTTCAACTTT    | TGCAGCTGGA            | AATAAAAACATCATCGTAATA  | CTTCTGTTG   |
| ?  | ?           | 0_AE002818 | + | 652     | 1015    | 2746-3413 | 668  | 5'  | 0  | TCACTCATTTG |                  | ACTTGCCCAT            | AAGCTGCCACTTAAAGAAAGCT | nnnnnnnnnn  |
| ?  | ?           | 0_AE003183 | + | 23192   | 23935   | 1438-2216 | 779  | 5'  | 13 | AAAGCAAGCC  |                  | AAATAACTCA            | AGGATATCGTGTGATCATGC   | AGTGGTAACA  |
| X  | 19F-19E3    | 0_AE002620 | + | 419801  | 420795  | 4019-5049 | 1031 | 5'  | 11 | ATACGTATTT  | AGCCCAAAAAGC     | CACCTACGCT            | AAAAAAAAAAAAAAAAAAAA   | CACAGTATG   |
| 2R | 47F18-47D1  | 3_AE002787 | + | 690985  | 691573  | 21-616    | 596  | 5'  | 0  | AGCAAAATTA  |                  | GACGTGTTCA            | ACACTGATTTGCAACCGTGA   | NNNNNNNNNN  |
| 2L | 38E6-39A    | 5_AE002690 | - | 842721  | 843185  | 1-471     | 471  | ?   | 0  | TACATTCCGA  |                  | GGGAGATGAG            | TGCTGTTGTTTCCCTAACCT   | NNNNNNNNNN  |
| X  | 8D9-8E4     | 3_AE002566 | + | 302101  | 302642  | 3595-4140 | 546  | 5'  | 0  | TACTCAATAT  | ATAAAAATAA       | TGCAGGCCCA            | AAGTAAAGTATCCTGGCTGT   | NNNNNNNNNN  |
| 2R | 54B1-54B2   | 1_AE002787 | - | 465053  | 465403  | 4686-5049 | 364  | 5'  | 11 | TTTTGTCAGC  |                  | TTGTACACCC            | AAATAATAAAAAACATCATCTG | CGTTTTTGAA  |
| 2R | 54B2-54A1   | 1_AE002787 | + | 590026  | 590409  | 1-389     | 389  | ?   | 0  | CACATTCCGA  |                  | GGGAGATGAG            | TGGTGGCATATAATTGAGAA   | NNNNNNNNNN  |
| 2R | 51E-51C     | 1_AE002787 | + | 2732683 | 2732918 | 4807-5049 | 243  | 5'  | 11 | ATCTTAGTTT  | TCTGGTTTTTTC     | CCCTTAACCT            | AAAAAAAAAAAAAAAAAAAA   | TCCAATTTAA  |
| 2R | 42A2-41F9   | 0_AE002769 | - | 333319  | 333942  | 2973-3613 | 641  | 5'  | 3  | AGAGATTTCC  |                  | GAGACTTTTG            | CTTACAGGTCTACTCCCTTCC  | CTGGGAAAA   |
| 2R | 42A2-41F9   | 0_AE002769 | + | 333880  | 334113  | 2603-2842 | 240  | 5'  | 3  | CAGTGTGCAA  |                  | TCATCCCTTG            | GACGCGTGCATATTGTAAT    | AAATAAATTA  |
| 2R | 41F11-41C   | 0_AE002769 | - | 853426  | 853701  | 2992-3268 | 277  | 5'  | 0  | GCTGCTCTTC  |                  | TCGTCACCCG            | CAACGGCTTGTAACCCCTAT   | ACCTATGCAT  |
| 2R | 41C-?       | 0_AE002769 | + | 1276505 | 1276761 | 3729-3983 | 255  | 5'  | 3  | CCCTCTCTTT  |                  | ACCCCTAAGC            | AATTTGACGTTGGAAGTGTCTC | AGGCCCTACC  |
| ?  | ?           | 0_AE002837 | - | 53916   | 56726   | 2777-4712 | 1936 | 5'  | 3  | TGGCGTGAA   |                  | AAAACCAACT            | TTAATGCAACCCCAACAGCC   | TTTTAGAAAA  |
| ?  | ?           | 0_AE002931 | + | 15143   | 15395   | 2785-3039 | 255  | 5'  | 3  | ATGTCATTAG  |                  | TTTTGAAATTA           | CGGATTCATCTGTTGCACTGGC | GCTGCAAAAA  |
| 3L | 73A3-73A3   | 1_AE002602 | + | 784974  | 785438  | 4570-5049 | 480  | 5'  | 0  | AGCATCTATT  |                  | ACATCATCGAAATAAAAAAA  | AACATCATCGAAATAAAAAAA  | GAGAAAAAAA  |
| 3L | 72A3-71E3   | 1_AE002602 | - | 1379462 | 1379910 | 4586-5049 | 464  | 5'  | 15 | CTCCGTGTGC  | TGGAGACCGGCGGC   | TCGGGGGGCT            | AAAAAAAAAAAAAAAAAAAA   | AAGTGACGTA  |
| 4  | 102D1-102D6 | 0_AE002796 | + | 76872   | 77077   | 3997-4202 | 206  | 5'  | 3  | GTCTGTATAA  |                  | TAGGCCCCAT            | GCTGAAAAAGTGTGCCAATGTG | ACAGGTAGTT  |
| 4  | 102B8-102B1 | 0_AE002796 | + | 373898  | 374193  | 4454-4755 | 302  | 5'  | 0  | ACCTGAATAT  |                  | TCCAAGTGCA            | TGCAGCTGTGTTCAATGCTGA  | NNNNNNNNNN  |
| ?  | ?           | 0_AE002830 | - | 743     | 1530    | 3759-4657 | 899  | 5'  | 3  | GTGCACGGTG  |                  | TTTGTCTGAG            | ACCAAGCTCAGAGCATCGCT   | GAAAAGTACA  |
| ?  | ?           | 0_AE002673 | + | 3168    | 3747    | 1532-2130 | 599  | 5'  | 3  | CAAACTGTGT  |                  | ACACTAATAA            | CTTCGGTTATTTCTTAGCGAT  | AGACTGTGCA  |
| 2L | 34C-34C7    | 2_AE002690 | - | 2517774 | 2518303 | 4504-5049 | 546  | 5'  | 13 | AAAAATATAC  | ATGAAAATTAATT    | CTGCAGGTAT            | AACATCATCGTAATAAAAAAA  | TGTGCCCAT   |
| X  | 15B-15D6    | 2_AE002593 | + | 112151  | 112491  | 4696-5049 | 354  | 5'  | 12 | TCTAGACTTT  | CTTAAGAAAACC     | TTGTACACCC            | AAAAAAAAAAAAAAAAAAAA   | CACCTCGAAT  |
| X  | 16A1-16D1   | 2_AE002593 | - | 607216  | 607465  | 4792-5049 | 258  | 5'  | 12 | GCTAGTGGG   | ATCCGAGGAAAT     | TCACACCCCT            | AAAAAAAAAAAAAAAAAAAA   | CAGAGAACTC  |
| X  | 17E9-18C1   | 2_AE002593 | - | 2645280 | 2645772 | 4541-5049 | 509  | 5'  | 16 | GCTGTCTTCT  | ACACAGAACTCGCAC  | TAAGATCCGG            | AAAACATCATCGTAAAAAAA   | ACACAGACAC  |
| 3R | 95D9-95E1   | 5_AE002708 | - | 1287700 | 1288041 | 4696-5049 | 354  | 5'  | 13 | CAATTCTGCT  |                  | ACACCACAC             | AAAAAAAAAAAAAAAAAAAA   | CACTTAAACA  |
| 3L | 63D3-63E1   | 1_AE002584 | + | 449460  | 449800  | 4696-5049 | 354  | 5'  | 11 | CCGTGTCCGC  |                  | GTGACACCCC            | AAAAAAAAAAAAAAAAAAAA   | GCATAAATTA  |
| 3L | 79A-79A4    | 0_AE002647 | - | 1412601 | 1412907 | 4702-5019 | 318  | 5'  | 3  | ATCACACTTT  |                  | CCCCAACAGC            | AGTTGCCGATGGGTAAACAGT  | TTTTTTTTTT  |
| 2L | 35B2-35B    | 3_AE002690 | - | 645078  | 645427  | 4666-5049 | 384  | 5'  | 0  | TCAACACTTCG |                  | TCACACTTCG            | AAAAAAAAAAAAAAAAAAAA   | GAAATATCTAT |
| 2L | 35B-35B4    | 3_AE002690 | - | 913609  | 913949  | 4696-5049 | 354  | 5'  | 9  | TGCTTTGTCA  | AAATTTCTTCT      | GTACACCCCC            | AAAAAAAAAAAAAAAAAAAA   | AACCTTTGCG  |
| 3L | 76A-75D     | 0_AE002602 | - | 1283926 | 1283926 | 4786-5049 | 264  | 5'  | 13 | AACTTTCCGG  | ATAAAAATTCGCAC   | ACCACCCTCA            | AAAAAAAAAAAAAAAAAAAA   | TGCAAAATTA  |
| 3R | 82C5-82A4   | 0_AE002681 | + | 1825548 | 1825741 | 4520-4720 | 201  | 5'  | 3  | AAACAAGACA  |                  | ATTCGCTCCC            | TCAATCTAATAGTCTAGTAGT  | ACGACTAAGT  |
| ?  | ?           | 0_AE002781 | + | 2893    | 3098    | 2305-2508 | 204  | 5'  | 3  | AAATAGTGTG  |                  | CAATGATCCTGCATCCTAAGG | CAATGATCCTGCATCCTAAGG  | ATGCTTTTAT  |
| ?  | ?           | 0_AE003314 | + | 301     | 435     | 4502-4720 | 219  | 5'  | 3  | GCATATCACT  |                  | CTATACAGCG            | TCAATCTAATAGTCTAGTAGT  | ACGACTAAGT  |

Full-length elements: 9/0  
 5' truncated elements: 40/6  
 3' truncated elements: 0/1  
 5'3' truncated elements: 0/14  
 Unfinished elements: 16  
 Total number of elements: 86  
 Total length of elements: 104949

TSD lengths (min/max): 3/16

## JuanDm

| Chr | Cyt       | Acc        | S | Coordinates     | Element   | Len  | Type | D  | 5' flank    | TSD             | Start       | End                | 3' flank   |
|-----|-----------|------------|---|-----------------|-----------|------|------|----|-------------|-----------------|-------------|--------------------|------------|
| 2R  | 43C7-43C1 | 4_AE002787 | + | 1235891 1240123 | 1-4243    | 4243 | F    | 12 | AAATTATATT  | TAAATTCATTAC    | ACAGTCTTCG  | CAAATAAAATAAAATAAA | TTACCAGGAG |
| X   | 7D2-7D5   | 2_AE002566 | - | 1828981 1833212 | 1-4243    | 4243 | F    | 12 | TATTTGAATC  | TTAAATATTATG    | TCAGTCTTCG  | TTAAATAAAAAATAAA   | CAGATACGTA |
| X   | 13B-13C1  | 1_AE002593 | + | 1591855 1596087 | 1-4243    | 4243 | F    | 13 | TGTGAGCCAC  | ATTGCGATGACTA   | CAGTCTTCGA  | AAATAAATAAATAAATAA | TTCTCGTGCG |
| X   | 20A5-20   | 0_AE002629 | + | 268307 272538   | 1-4242    | 4242 | F    | 13 | AAATATGCACA | TAATGTTGTTTCG   | GTGTCTTCGA  | GCACAAATAAATAAATAA | TTCTGTGGCA |
| 2L  | 24D-24D1  | 0_AE002638 | + | 874492 877244   | 1482-4242 | 2761 | F    | 14 | ATGCAATTTT  | AAAAGCAAAACAAA  | CGGTCTTAAAT | AAATTAATAAATAAATAA | CACCTTGTGA |
| 3R  | 88E-88E8  | 2_AE002708 | - | 1363833 1366823 | 1-4243    | 4243 | F    | 15 | AAAGCPTTAA  | ATTACTGCTTATTAC | AGTCTTCGAC  | AAATAAATAAATAAATAA | CTTTTCGGGA |
| 3R  | 82C5-82A4 | 0_AE002681 | + | 1923410 1923933 | 372-5401  | 5030 | ?    | 0  | NNNNNNNNNN  |                 | TTATAAATTA  | CAAATAAATAAATAAATA | TTAATAAAAA |
| 3L  | 75A7-74F1 | 0_AE002602 | + | 2582603 2583169 | 3724-4243 | 520  | 5'.  | 13 | AAATTTAATT  | ATTTAGTGTTTTC   | CACGTACCC   | AAATAAATAAATAAATAA | AGCTAAAAAG |

Full-length elements: 5/0  
 5' truncated elements: 2/0  
 3' truncated elements: 0/0  
 5'3' truncated elements: 0/0  
 Unfinished elements: 1  
 Total number of elements: 8  
 Total length of elements: 25026  
 TSD lengths (min/max): 12/15

## Waldo-A

| Chr | Cyt        | Acc        | S | Coordinates     | Element   | Len  | Type | D  | 5' flank   | TSD              | Start                | End                       | 3' flank    |
|-----|------------|------------|---|-----------------|-----------|------|------|----|------------|------------------|----------------------|---------------------------|-------------|
| 2L  | 31A-31B3   | 1_AE002690 | - | 2182875 2188091 | 217-5408  | 5192 | 5'.  | 5  | CACACCACT  | AGATA            | TAAGCAGCT            | ATAATAAAAAAAAAAAAAA       | GCACCTCTATG |
| 2L  | 32B-32C    | 1_AE002690 | + | 2907119 2908673 | 3850-5407 | 1558 | 5'.  | 15 | TGACGGGCC  | AAGGGCACAGGACGA  | TACGGAATGG           | ATAATAAAAAAAAAAAAAA       | ACAAGGTTCA  |
| 3R  | 98B-98A    | 6_AE002708 | + | 2003321 2006599 | 2087-5409 | 3323 | 5'.  | 0  | CTAACCCAC  |                  | CCACTCCAC            | TAAGTCAAATAAATAAATAA      | CACACACACA  |
| 3R  | 83A6-82E4  | 0_AE002681 | + | 989371 994362   | 372-5401  | 5030 | 5'.  | 14 | TACATACTAG | ATGCAAGCGAAAAG   | TAGTGTGTCT           | GTCAAATAAATAAATAAATA      | GACTATGGAA  |
| 3R  | 84A2-?     | 0_AE002699 | - | 1278982 1281244 | 3146-5409 | 2264 | 5'.  | 26 | CACACACACA | ACACACACACACACAC | TGTTACCAAA           | AAAAAAAAAAAAAAAAAAAA      | AAAGTCAAAC  |
| 3L  | 70F2-70E1  | 1_AE002602 | - | 2560842 2562637 | 3606-5403 | 1798 | 5'.  | 10 | GTCGGGCCCC | CATTAGCAGC       | CTAGCCTAAC           | TCAAATAAATAAATAAATAA      | TTGTAAAAAC  |
| 3R  | 88A4-88B1  | 2_AE002708 | + | 212167 212167   | 3278-5409 | 2132 | 5'.  | 14 | TACATCTGTA | ATATATGCACATAT   | GCACGAACT            | AAAAAAAAAAAAAAAAAAAA      | AGCCAGCGAT  |
| 3L  | 65C-65B5   | 4_AE002602 | + | 1623583 1623949 | 5042-5408 | 367  | 5'.  | 15 | CACACATATC | ACACGTACTCTGGC   | ACATCCAACA           | AAAAAAAAAAAAAAAAAAAA      | TCACACATGG  |
| ?   | ?          | 0_AE003116 | - | 399 3588        | 411-5176  | 4766 | 5'3' | 0  | AAACAGAACC |                  | AATAAAAATA           | GCCCTCATGGACTCACAAAG      | TCATACCTTG  |
| ?   | ?          | 0_AE002665 | - | 105237 108002   | 1-5409    | 5409 | F    | 11 | CACACACACA | ACCCGTTGGAG      | ACCAAGTCTA           | AAAAAAAAAAAAAAAAAAAA      | CGCAGAGTGG  |
| 2R  | 44D4-44D   | 4_AE002787 | + | 189616 191230   | 3743-5409 | 1667 | 5'.  | 15 | CAATACACAA | ACACACACACACACA  | CGTCCAATTG           | GTCAAATAAATAAATAAATA      | TAGTGAGCAG  |
| ?   | ?          | 0_AE002751 | - | 57160 61158     | 1112-5303 | 4192 | 5'3' | 13 | TTGTGAGCC  | TTCTAACGCCAC     | GGAAGACCAA           | AAAAAAAAAATAAATAAATA      | AAACCGCACA  |
| ?   | ?          | 0_AE002751 | - | 64862 65166     | 776-1080  | 305  | 5'3' | 0  | AATCTCGGTT |                  | GCCTCTTAACTCTCAGCCTT | GTCTTAATAAATAAATAA        | ATTTTACATG  |
| ?   | ?          | 0_AE002805 | + | 3007 6264       | 4-5260    | 5257 | .    | 16 | GCGTSTAATA | AAGATTAGATTCTAAG | GAAGACCAAG           | GTGCAATAAATAAATAAATA      | CTATCAAGTA  |
| ?   | ?          | 0_AE002700 | - | 23296 25687     | 1683-5310 | 3628 | 5'3' | 0  | CGGCCGCTTT |                  | TTGAGACGTA           | AGGCATAACTCCAATAGGCCT     | GTCCATTATT  |
| ?   | ?          | 0_AE002777 | + | 12782 15629     | 1989-5409 | 3421 | 5'.  | 0  | GGTGAAGCTG |                  | CCACAATGCC           | AAAAAAAAAAAAAAAAACAAAGA   | CAAACAATAA  |
| X   | 20A5-20    | 0_AE003166 | - | 843 4391        | 696-5408  | 4713 | 5'.  | 14 | GATCTGATTT | AGACAACATGGAA    | GACAAGTCT            | TCGAATAACAAAATAAATAA      | ACGATTAATG  |
| 2R  | 41F11-41C  | 0_AE002629 | + | 258229 260985   | 1-4959    | 4959 | .    | 4  | CCTTTGTCTC | GGAG             | ACCAAGTCTA           | CCTAGTGAATAGCTGGCATG      | CTGGACACA   |
| 2R  | 41F11-41C  | 0_AE002769 | - | 598287 598956   | 3955-5150 | 1196 | 5'3' | 7  | GGTTTTTCCC | AAGGATC          | TGGGGAACAT           | AAAAGGCTAAAATAGGGGAA      | GGATCTGTTA  |
| 2R  | 41F11-41C  | 0_AE002769 | - | 649497 650000   | 4802-5303 | 502  | 5'3' | 0  | AGGTTTAAGA |                  | TCCTCACAAAG          | AGTACGCTAGGCAATAATCCCTA   | CCTACGGACA  |
| 2R  | 41F11-41C  | 0_AE002769 | - | 655047 659167   | 69-4448   | 4380 | 5'3' | 4  | CGATCCTAAT | AACT             | GATATAGGGT           | TCCCGCTGGCAACATCCCGC      | CTTGTATTCG  |
| 2R  | 41F11-41C  | 0_AE002769 | - | 704697 705459   | 3349-4111 | 763  | 5'3' | 0  | AGATACTAAT |                  | GGACAAGATG           | CGATTGCTACTGTCTCCACT      | ACACTGTGGT  |
| 2R  | 41F11-41C  | 0_AE002769 | + | 708966 711310   | 27-2813   | 2787 | 5'3' | 7  | GTGTTTTTAA | ACAAGCA          | TGGACGAAAT           | CTATATATATATATACAA        | CATTGTAGCA  |
| 2R  | 41F11-41C  | 0_AE002769 | - | 751906 756299   | 929-5409  | 4481 | 5'.  | 0  | ACACACACAT |                  | CTTCGGACCT           | AAAAAAAAAAAAAAAAAAAA      | CAGGGCTCC   |
| 2R  | 41F11-41C  | 0_AE002769 | - | 866975 868868   | 679-3841  | 3163 | 5'3' | 0  | TGAGACGTAA |                  | CATACGTGTG           | TGTCCCATGGTCGATAAGGA      | AGCTGGGCCA  |
| 2R  | 41F11-41C  | 0_AE002769 | - | 989689 990632   | 324-1283  | 960  | 5'3' | 5  | TCTTAAGTAA | AGAGA            | AGATTCAATA           | GGAGAGGAAAGCGGAAGGC       | CGGGTAGGC   |
| 2R  | 41F11-41C  | 0_AE002769 | - | 991273 991477   | 324-529   | 206  | 5'3' | 0  | TCTCTAAGT  |                  | AAAGAGAAGA           | CTGCACGCTCTATTCTAAGA      | CATTGCACAG  |
| 2R  | 41F11-41C  | 0_AE002769 | - | 992120 992324   | 324-529   | 206  | 5'3' | 0  | TCTCTAAGT  |                  | AAAGAGAAGA           | CTGCACGCTCTATTCTAAGA      | CATTGCACAG  |
| 2R  | 41F11-41C  | 0_AE002769 | - | 995474 996688   | 2324-3573 | 1250 | 5'3' | 0  | AGGAACATGC |                  | GAATCACCTA           | GGAAAATGTTCCGAACATATC     | AAAAGCCTTG  |
| 2R  | 41F11-41C  | 0_AE002769 | - | 1013090 1014952 | 703-3820  | 3118 | 5'3' | 0  | AAGGGAACC  |                  | TCCGGAACC            | TCCGAGCCATAAATCTATGG      | TACCTGAGGA  |
| 2R  | 41F11-41C  | 0_AE002769 | + | 1108778 1109160 | 5024-5406 | 383  | 5'.  | 0  | CATTAGTTGG |                  | GAGCAGCAGC           | TAAAATAAAAAATAAAAA        | CCGGAGCATT  |
| 2R  | 41F11-41C  | 0_AE002769 | - | 1139890 1140817 | 3387-4394 | 1008 | 5'3' | 0  | TCGTAATTTA |                  | GGAGTTGAGT           | CACGAAACCAATGATACCAAT     | GATTTGATGGT |
| 2R  | 41C-?      | 0_AE002769 | - | 1336802 1339555 | 611-5394  | 4784 | 5'3' | 0  | CCGTAGCCCG |                  | AAITGATGGA           | CGTAAGTCGAATAAATAAATA     | TCCAATCGCA  |
| 2L  | 41C-39E3   | 0_AE002725 | + | 36156 38036     | 1934-5176 | 3243 | 5'3' | 0  | AGCGTCAAAA |                  | CAGCAGCTTA           | GAGGGCCATGGACTACCGAAG     | TCCATACCTC  |
| 2L  | 40A4-?     | 0_AE002725 | + | 705501 705660   | 4972-5281 | 310  | 5'3' | 0  | TTGTTATTCT |                  | GTGTCTTTTG           | AGCACGTGGAGATTTTTGTTT     | CGCGAGTCA   |
| ?   | ?          | 0_AE002590 | - | 301 2002        | 1212-4352 | 3141 | ??   | 0  | NNNNNNAAAA |                  | CCCAAAGTTC           | TAGCTAGACTCATGCCCAACG     | Tnnnnnnnnn  |
| 3R  | 86D-86D1   | 1_AE002708 | + | 225812 226441   | 84-714    | 631  | 5'?  | 0  | CACACACACA |                  | TTCCTGGGAG           | ACCAGAGGAGTCGGTAAACCG     | NNNNNNNNNN  |
| 3R  | 86D-86D1   | 1_AE002708 | + | 230478 230927   | 4957-5409 | 453  | ?    | 0  | NNNNNNNNNN |                  | ATGATGGCGA           | TAAAAAATAAATAAATAAACA     | TGTCGCTGTG  |
| ?   | ?          | 0_AE002705 | + | 1576 3674       | 1970-5403 | 3434 | 5'.  | 0  | AGATGCTCTC |                  | ATACGGTTAG           | AAAAAAAAAAAAAAAAACACCTAAA | TTCACAATAC  |
| ?   | ?          | 0_AE002752 | + | 964 2988        | 3-4114    | 4112 | .    | 3  | AAATTTTTTT |                  | GGACAAGTCT           | TTGGAGCTGCCATCCATGGC      | AGCACTACTA  |
| ?   | ?          | 0_AE002740 | - | 301 1646        | 103-3876  | 3774 | ?    | 0  | nnnnnnnnnA |                  | TGGCGAACC            | TAAACCAACGGAGCCGGCCCA     | AAAAAATACC  |
| 3L  | 70C5-70A   | 2_AE002602 | - | 690654 691133   | 2-481     | 480  | ?    | 0  | CATATGTTAG |                  | GGGACGAAAT           | TCCAGCGGCTGGTGCCTAAGC     | NNNNNNNNNN  |
| 3L  | 69F6-69D   | 2_AE002602 | + | 1340272 1345294 | 1-5409    | 5409 | F    | 14 | CAGAAGCTGT | AGGACATCCCACA    | GGGACGAAAG           | AAAAAAAAAAAAAAAAAAAA      | TTACTCCACT  |
| 2R  | 49B12-48F5 | 2_AE002787 | - | 2212941 2213353 | 4996-5409 | 414  | ?    | 0  | NNNNNNNNNN |                  | ATTATCATTA           | TAAAAAATAAATAAATAAATA     | AAAAAATAAA  |
| 2R  | 49B12-48F5 | 2_AE002787 | - | 2214863 2215285 | 3325-3747 | 423  | 5'?  | 0  | CTCCACTTTT |                  | CGCATCAAAC           | AGGAAGGAATCTGCGCAATT      | NNNNNNNNNN  |
| ?   | ?          | 0_AE003091 | - | 11380 12809     | 2555-4359 | 1805 | 5'3' | 0  | GCCTGAGGCA |                  | TAATGCTGAA           | TATGTTGGCAGACGCGAGGC      | ATGGAGCTG   |
| ?   | ?          | 0_AE002896 | - | 14931 16487     | 1171-4273 | 3103 | 5'3' | 0  | GACTGAGGAA |                  | AAAAGCCTAC           | TGTAATGATAGTGACAATAT      | TAAITTTATTT |



|    |          |            |   |         |         |           |      |      |    |            |                  |              |                        |             |
|----|----------|------------|---|---------|---------|-----------|------|------|----|------------|------------------|--------------|------------------------|-------------|
| ?  | ?        | 0_AE002760 | + | 5251    | 5592    | 21-363    | 343  | 5'3' | 0  | TTCCATCCAT |                  | CGTGAAGACA   | AAATCTTTAAATTTAATTTCA  | TACTGGTTCC  |
| X  | 17E-17E  | 2_AE002593 | - | 1956702 | 1958663 | 811-5232  | 4422 | 5'3' | 4  | ATCAGCGCCT | GTCC             | GTGGACATCT   | CATCGAAGTCATACAATGGCA  | CGGTGAGCGT  |
| ?  | ?        | 0_AE002902 | + | 301     | 672     | 1660-2337 | 678  | ?3'  | 0  | nnnnnnnnnn |                  | AGCAGAGGAG   | TTGCGGGGTATCGCTTTTGGC  | CCAGAGGCCG  |
| ?  | ?        | 0_AE002586 | - | 369     | 1106    | 3878-5006 | 1129 | ?3'  | 0  | nnnnnnTGGC |                  | GCTCAAAAGC   | CCTTATCATTAATATGATGAA  | CGGAGTCCGA  |
| ?  | ?        | 0_AE003100 | - | 301     | 392     | 5141-5409 | 269  | 5'1' | 0  | TACGCTTAGT |                  | GCCCGTAATA   | AAAAAGACAAACATGGAAACA  | ATAAATGTTG  |
| ?  | ?        | 0_AE003100 | - | 34010   | 34785   | 2528-3396 | 869  | 5'3' | 0  | GGGAATCAGA |                  | TAGACGCTAT   | TTGTTAAAGCAGTCGGTGGAT  | TAAGATATCC  |
| ?  | ?        | 0_AE002943 | - | 1561    | 2242    | 3733-4427 | 695  | 5'3' | 0  | TCGTATATAC |                  | GAATACTGCG   | GGTAGCAAAGGCTTCGCCACT  | AGCAGGGGTT  |
| ?  | ?        | 0_AE003230 | - | 301     | 543     | 1-543     | 543  | .?   | 0  | AATGTTCGGG |                  | GGGACGGAAG   | TCCGTAAAAGCCAGGGGGAAG  | Tnnnnnnnnnn |
| ?  | ?        | 0_AE003151 | + | 658     | 908     | 684-1233  | 550  | 5'2' | 0  | TGCATGTGCA |                  | GTGATCCCCC   | CAAAAGTCCAGTCGCCCAAGC  | nnnnnnnnnn  |
| ?  | ?        | 0_AE002808 | + | 2631    | 2982    | 4600-5212 | 613  | 5'3' | 0  | GCAATGCCAC |                  | AGCAGGGGCTT  | TGGCCTCACATCCTGCTCATC  | CTGTTCATTC  |
| ?  | ?        | 0_AE002688 | - | 14380   | 15021   | 4418-5291 | 874  | 5'3' | 0  | CGGCCAGGAA |                  | CTGCTGGTGG   | GGTTTTTGGTTTTAGTACGCAG | TTTATGAATC  |
| 3L | 17E-77B1 | 0_AE002602 | - | 3215    | 4504    | 452-3669  | 3218 | 5'3' | 0  | TATTTAATTT |                  | ATCATCCTCT   | AAATAGTCCCTGGACGCTCTC  | GGACGCAATG  |
| X  | 19F-19F3 | 0_AE002620 | + | 343445  | 343899  | 4954-5406 | 453  | 5'1' | 0  | CTCTTAGGTT |                  | GCCATGATGT   | TAATAAATGATAATAATAATA  | TGATAGCAGA  |
| X  | 5E8-5E   | 2_AE002566 | + | 89028   | 89818   | 293-5388  | 5096 | 5'3' | 7  | CACACACACA | ACACACA          | CGACAAGTGT   | TTCTGCGCTATATAAAAAAA   | GATGCATGGA  |
| X  | 6A2-6A   | 2_AE002566 | - | 238651  | 243433  | 16-5409   | 5394 | 5'1' | 19 | CACATACACA | ACACACACACACACAC | GACGACAGGA   | TAATAAAAAAATAAAAAAATA  | AGCAAAACAGA |
| ?  | ?        | 0_AE002918 | - | 28782   | 29233   | 4953-5409 | 457  | 5'1' | 0  | GCTATGGCTA |                  | GGCTATGTTG   | TCGAGTTATAATAAAAAAATA  | CACACACACC  |
| ?  | ?        | 0_AE002580 | + | 301     | 618     | 4752-5409 | 658  | ?    | 0  | nnnnnnnnnn |                  | ACCCAGTTTC   | TAATAATAAAAAAATAAATAA  | CAGAAAAGGG  |
| ?  | ?        | 0_AE002806 | - | 3006    | 3303    | 2364-3038 | 675  | ?3'  | 0  | nnnnnnnnnn |                  | CTGCTATGCT   | CCACGCGGAGGCTCTGGAGG   | CAAAGCCATA  |
| ?  | ?        | 0_AE002644 | + | 301     | 515     | 3352-3657 | 306  | 5'3' | 0  | CCAAGCAAAG |                  | CAGATGGTAT   | TTCCGGAAAGGAAAGAGTAGT  | GACCTGCAAT  |
| ?  | ?        | 0_AE003085 | + | 301     | 442     | 4718-5111 | 394  | 5'3' | 0  | CAGCTCATCC |                  | AGAGATGACG   | GCGAAGAATCTCTATCTCAGCG | CTTTTAATTA  |
| ?  | ?        | 0_AE002703 | + | 301     | 386     | 5011-5409 | 399  | ?    | 0  | nnnnnnnnnn |                  | TGAAGCCGCT   | CAAAATAAATAAAAAAATAA   | TCATTGCTGT  |
| ?  | ?        | 0_AE002837 | + | 10364   | 10968   | 1157-2323 | 1167 | 5'3' | 0  | TAAACACATA |                  | AAAAAGGCCCT  | TGGCAGCCTAACTTATGCGGG  | TAAGTAAGAG  |
| ?  | ?        | 0_AE002653 | + | 2172    | 2500    | 2493-2821 | 329  | 5'2' | 0  | CACACTAACA |                  | CACCCACAC    | ATCATATCAATTCCTGGAAA   | NNNNNNNNNN  |
| ?  | ?        | 0_AE003040 | + | 12802   | 13087   | 2050-2343 | 294  | 5'3' | 4  | TTACGAAAGA | GTTA             | GCTCAACCTA   | GCGGGTACGTCATTTGTTGAC  | CCTTTATCAG  |
| ?  | ?        | 0_AE002960 | - | 19200   | 19647   | 4229-5272 | 1044 | ??   | 0  | nnnnnnnnCC |                  | AAGACTCCCC   | GGACTAAAGGCACACGGGAGG  | NNNNNNNNNN  |
| ?  | ?        | 0_AE002919 | - | 2273    | 2495    | 3757-3987 | 231  | 5'3' | 0  | GATGGCTAAA |                  | GACAGAAGAA   | ATGTACGATGTCATTTTGTG   | TGACGATGTG  |
| ?  | ?        | 0_AE003098 | + | 301     | 287     | 4746-5032 | 287  | ?3'  | 0  | nnnnnnnnnn |                  | ACCCTAACCC   | GTGGACGTGTAAGTCCAAAGA  | GTCTCTCTGG  |
| ?  | ?        | 0_AE003048 | + | 28233   | 28555   | 5087-5409 | 323  | 5'1' | 0  | CTTTAGAGTT |                  | GCGGGCAGAG   | AAAAAAACAATAAAAAAATA   | TGGGTCCTCA  |
| ?  | ?        | 0_AE003278 | + | 2969    | 3299    | 1975-2301 | 327  | 5'3' | 0  | GATCACACCT |                  | GGTGAGCTGT   | CACGAGTGCCAGATGGACAA   | TACGGTAGCC  |
| ?  | ?        | 0_AE002761 | + | 3912    | 4116    | 1945-2497 | 553  | 5'2' | 0  | ACCCCTTTTC |                  | GATAAGGAGA   | GGGCAGTGAATGGGGCAGCA   | AAATnnnnnn  |
| ?  | ?        | 0_AE003118 | + | 39973   | 40169   | 2540-2739 | 200  | 5'3' | 0  | CCCCAGAGCC |                  | GAATGCTGGA   | AGTGGCTGCTGAGAGAGGTGG  | TCTTACCAGC  |
| ?  | ?        | 0_AE003109 | + | 2394    | 2428    | 4-338     | 335  | .?   | 0  | CCCTGTATGA |                  | GACGAACTCT   | GGCGCGCAATTCAAAATTA    | nnnnnnnnnn  |
| ?  | ?        | 0_AE003017 | - | 17684   | 17927   | 3733-3983 | 251  | 5'2' | 0  | TCGTATATAC |                  | GAATACTGCG   | CATCATTACGATGGGATCTT   | NNNNNNNNNN  |
| ?  | ?        | 0_AE003243 | - | 633     | 920     | 4976-5355 | 380  | 5'3' | 0  | TTCAAGACGC |                  | CGTATTGTAGCG | CGGTATTTGATCTGCAATTTG  | GTCTCCTTTA  |
| ?  | ?        | 0_AE003183 | + | 46763   | 46957   | 5207-5408 | 202  | 5'1' | 0  | GACTTCAAAA |                  | CTCATAGAAG   | ATAAAAAAATAAAAAACCTAA  | TACCCCATAA  |

Full-length elements: 2/0  
5' truncated elements: 10/10  
3' truncated elements: 2/1  
5'3' truncated elements: 8/29  
Unfinished elements: 20  
Total number of elements: 82  
Total length of elements: 153858  
TSD lengths (min/max): 4/26

## Waldo-B

| Chr | Cyt        | Acc        | S | Coordinates | Element | Len       | Type | D    | 5' flank | TSD        | Start           | End         | 3' flank               |            |
|-----|------------|------------|---|-------------|---------|-----------|------|------|----------|------------|-----------------|-------------|------------------------|------------|
| 3L  | 61F-62A1   | 0_AE002584 | + | 1404029     | 1409224 | 1-5179    | 5179 | F    | 12       | CACACACACA | ACATCCATTGTC    | CCGCGTATTT  | AAAAAAAAAAAAAAAAAAAAAA | GGGCGCAGTC |
| 3R  | 92A14-92B2 | 3_AE002708 | + | 2971807     | 2976993 | 1-5179    | 5179 | F    | 16       | CACGGAACAC | ACAGGTCCTAAATGG | AGTTCGCCGG  | ATAAAAAAAAAAAAAAAAAAAA | CAAATGCTTA |
| 3R  | 85D2-85D10 | 0_AE002708 | - | 1561293     | 1566460 | 1-5175    | 5175 | F    | 15       | AGCACGCAC  | TCCAGCAGAGCGATG | AGAGGTGTGT  | AAAAAAAAAAAAAAAAAAAAAA | GCCGAATAAA |
| ?   | ?          | 0_AE002870 | + | 1266        | 6282    | 164-5175  | 5012 | 5'1' | 0        | GCGTCACGGT |                 | TCGTAATAAA  | GCCATACACAAAATCATAGAA  | TGCCTTAGGA |
| 3L  | 66C-66B10  | 4_AE002602 | + | 19315       | 24509   | 1-5179    | 5179 | F    | 13       | CACACACACG | ACACAAGAACTG    | TGAGGAGACG  | AAAAAAAAAAAAAAAAAAAAAA | CACACAGACA |
| 3L  | 65C-65B5   | 4_AE002602 | + | 1623683     | 1623951 | 4906-5180 | 275  | 5'1' | 0        | GGCGACTAAA |                 | GGTGAAGGGA  | AAAAAAAAAAAAAAAAAAAAAA | CGTACCTTG  |
| ?   | ?          | 0_AE003116 | + | 15395       | 20439   | 4440-4752 | 313  | 5'3' | 5        | CGTGAACACA | CACA            | CACAGCACAA  | AGAGGCTTGGTTGCTGCTATG  | AGTAAGACGG |
| 2R  | 50C3-50C4  | 2_AE002787 | + | 812315      | 814233  | 3266-5180 | 1915 | 5'1' | 16       | TTTTATTCCC | AGATCAGTTTTACCT | TGTCCTTCTG  | AAAAAAAAAAAAAAAAAAAAAA | CTCTGCGCTG |
| 2R  | 49B12-48F5 | 2_AE002787 | - | 2212934     | 2213210 | 4906-5180 | 275  | 5'1' | 0        | GGCGACTAAA |                 | GGTGAAGGGA  | AAAAAAAAAAAAAAAAAAAAAA | CCTCCACTTT |
| 2L  | 31A-31B3   | 1_AE002690 | - | 2182873     | 2183141 | 4906-5177 | 272  | 5'1' | 0        | GGCGACTAAA |                 | GGTGAAGGGA  | TAATAAAAAAAAAAAAAAAAAA | GATAGCACTC |
| ?   | ?          | 0_AE002751 | - | 1304        | 3588    | 1902-4881 | 2980 | 5'3' | 0        | CCCCCTTCTG |                 | CATCATTCAG  | CCGTATGTTGGCGGGGCAAGA  | TACGTAGGGC |
| ?   | ?          | 0_AE002600 | + | 3908        | 8862    | 1-5177    | 5177 | F    | 0        | CGTTCGAGTT |                 | CCGCGTATTT  | AAAAAAAAAAAAACAAAAAATA | TACCAAGTAC |
| 2R  | 41F11-41C  | 0_AE002769 | - | 628676      | 630187  | 2785-5172 | 2388 | 5'1' | 0        | GGTACTATAT |                 | CAGTGATCTA  | AAAAAAGATAAACACCGGAAA  | CCGTAAATGT |
| 2R  | 41F11-41C  | 0_AE002769 | - | 645872      | 648121  | 1682-4521 | 2840 | 5'3' | 0        | TCCAGACAT  |                 | CGACCGGGCT  | ACTACATGGGCTGAGTGTGAG  | TGGACTACCA |
| 2R  | 41F11-41C  | 0_AE002769 | - | 751900      | 752173  | 4906-5179 | 274  | 5'1' | 0        | GGCGACTAAA |                 | GGTGAAGGGA  | AAAAAAAAAAAAAAAAAAAAAA | CAGGGGCTCC |
| 2R  | 41F11-41C  | 0_AE002769 | - | 821448      | 823244  | 2111-5049 | 2939 | 5'3' | 0        | GGCCATTAAA |                 | CGCGCCTAGC  | AGAGCGGGGCTTTTTTAATT   | CTCTAAATAA |
| 2R  | 41F11-41C  | 0_AE002769 | - | 1090465     | 1091325 | 3266-4230 | 965  | 5'3' | 0        | GTITCTTTCT |                 | AACCTGGTAT  | GCTGCCCTATCTGGAGCTGCC  | AAATTCGTTT |
| 2R  | 41F11-41C  | 0_AE002769 | - | 1184036     | 1184844 | 3448-4363 | 916  | 5'3' | 0        | GCAACCCGCA |                 | ACCCCTCGCG  | GGCATTACACAGCCATTGAC   | CCCATGCGAG |
| 3R  | 98B-98A    | 6_AE002708 | + | 2006331     | 2006603 | 4906-5180 | 275  | 5'1' | 0        | GGCGACTAAA |                 | GGTGAAGGG   | TAAGTCAATAATAAAAAAATA  | CACACACACA |
| 3L  | 68C5-68A8  | 2_AE002602 | + | 2982758     | 2983699 | 4230-5180 | 951  | 5'1' | 15       | ATAAACAGAA | ACACTTATCCATAAG | AAAACTATC   | ATAATAAAAAAAAAAAAAAAAA | TAATGGCAAA |
| 3R  | 84A2-?     | 0_AE002699 | - | 1278978     | 1279249 | 4906-5180 | 275  | 5'1' | 0        | GGCGACTAAA |                 | GGTGAAGGGA  | AAAAAAAAAAAAAAAAAAAAAA | CACACACACA |
| ?   | ?          | 0_AE003166 | - | 835         | 1113    | 4902-5180 | 279  | 5'1' | 8        | CCCGGCTTTT | GTAAATGT        | CGACTAGAGG  | AAAAAGACAAACATGGAAACA  | TGCTCTGCTT |
| ?   | ?          | 0_AE002760 | + | 45656       | 47380   | 3326-5135 | 1810 | 5'3' | 0        | GGACAACTAT |                 | TGTTATCTGTT | ATCTTTAAGAGATTTTACTTT  | TATTTTTGTC |
| 3R  | 88A4-88B1  | 2_AE002708 | + | 211906      | 212171  | 4906-5173 | 268  | 5'1' | 0        | GGCGACTAAA |                 | GGTGAAGGG   | CAATAATAAAAAAAAAAAAAA  | TATATGCACA |
| ?   | ?          | 0_AE002665 | - | 105232      | 105505  | 4906-5180 | 275  | 5'1' | 0        | GGCGTATAAA |                 | GGTGAAGGGA  | AAAAAATAAAAAAAAAAAAAA  | CCCGTTGGAG |
| ?   | ?          | 0_AE002777 | + | 15415       | 15633   | 4958-5179 | 222  | 5'1' | 0        | AGGGAGTGGG |                 | GCTCCACATC  | AAAAAAAAAACAAAGACAAA   | CAATAAAACG |
| 3L  | 64C2-64C1  | 1_AE002584 | - | 1747372     | 1748152 | 4397-5180 | 784  | 5'1' | 0        | GAAGGGCTGC |                 | GCTGCACCTA  | AATAATAATAAAAAAAAAAAAA | CACATATATA |

|    |           |            |   |         |         |           |      |      |   |            |            |                         |             |
|----|-----------|------------|---|---------|---------|-----------|------|------|---|------------|------------|-------------------------|-------------|
| 2R | 44D4-44D  | 4_AE002787 | + | 190962  | 191234  | 4906-5180 | 275  | 5'   | 0 | GGCGACTAAA | GGTGAAGGG  | TCAATAATAAAAAAAAAAAAA   | CACACACACA  |
| ?  | ?         | 0_AE003100 | - | 301     | 614     | 4683-5120 | 438  | 5'3' | 0 | GTATGCCATT | CGAGGAGAGG | GGTATCTTTAGAAAGATTTTCAT | TTTCCTGCCG  |
| ?  | ?         | 0_AE003159 | + | 11060   | 11772   | 1776-2425 | 650  | 5'3' | 0 | GGCTACGACG | CCAAGATGCT | ATGTACCTTTTGTAGCAGAG    | AGTGGCTAAT  |
| ?  | ?         | 0_AE003010 | + | 1476    | 2451    | 4116-5166 | 1051 | 5'3' | 0 | TCGTTCAAAA | AGCGGCAATG | CGGATATAAAAAATAAAAAAAAA | GATATTTGTTT |
| ?  | ?         | 0_AE002902 | - | 9450    | 10549   | 1648-3124 | 1477 | 5'3' | 0 | GGTGTGCGAT | GTCCAACAAT | TCCAAGCTGCAAAAGAGAAATCA | AGGGTGTCCG  |
| ?  | ?         | 0_AE002705 | + | 3441    | 3685    | 4932-5180 | 249  | 5'   | 0 | TTTCGGGCTG | CGTTAAAGGC | AACACCTAAATTCACAATACA   | CTGAGCGATT  |
| ?  | ?         | 0_AE003344 | - | 608     | 1577    | 3043-4594 | 1552 | 5'3' | 0 | TTTTGCCGCG | TGGCCAACAT | TTTCGAGGGTACCTATCTATGT  | GTATTTAAAT  |
| ?  | ?         | 0_AE003394 | + | 2303    | 4014    | 2432-3454 | 1023 | 5'3' | 0 | CTATACCTTT | TGGCGTGGAA | GAAAGGGCAAATGCACGGTAG   | TTAGCAACCG  |
| 2L | 44D4-39E3 | 0_AE002725 | + | 37984   | 38222   | 4932-5166 | 235  | 5'3' | 0 | TCCCGGCTTG | CGTAAAAGTC | CGAATAATAAAAAAAAAAAAAAA | CTGCGATGAA  |
| ?  | ?         | 0_AE003262 | + | 301     | 388     | 4766-5154 | 389  | ?'3' | 0 | nnnnnnnnnn | CGTTTGGGAT | TTCTCGCTATATAATAAAAA    | CCTCCTCATA  |
| ?  | ?         | 0_AE002911 | + | 7497    | 7906    | 3759-4165 | 407  | 5'3' | 0 | GCGTCTGATG | TATGTAACAG | TTGAAGGACCAGAAATGCCGG   | GAGTCTCCG   |
| ?  | ?         | 0_AE002662 | + | 4450    | 4811    | 1838-2196 | 359  | 5'3' | 0 | AAGGTCGCG  | CCTGACCTAC | AGCCCGAGCAAATCGAGGAC    | CAGGAGTCCT  |
| ?  | ?         | 0_AE003279 | - | 301     | 648     | 89-454    | 366  | 5'3' | 0 | CCATAATTAA | AATCCACACT | AGTTTGTGGGGGGGGGGGGGG   | GTGGCGGCTC  |
| ?  | ?         | 0_AE003243 | - | 589     | 838     | 4919-5170 | 252  | 5'   | 0 | GAGGTGCGTC | CGATGCTGTA | GTTTAGAAAACTTAAATAACA   | CTCCTTAGAA  |
| X  | 19D-19D   | 0_AE002620 | + | 1108795 | 1109036 | 4920-5164 | 245  | 5'3' | 0 | GCCACGAATC | GCTGGTGGCG | AAAGTTCAATAATAAAAAAAAA  | TACCGTGAAA  |
| ?  | ?         | 0_AE002761 | + | 3917    | 4116    | 1737-2290 | 554  | 5'?  | 0 | TTTTCTGATA | GGAGAACATA | GCACCTGGAATGGGCAGCAAA   | GTAnnnnnnn  |
| X  | 5E8-5E    | 2_AE002566 | + | 89445   | 89827   | 552-5163  | 4612 | 5'3' | 0 | TCCAATTCAC | GAGCGAGGGG | TCCTGCCGTATATAAAAAAAAA  | CACACAGAGC  |
| X  | 6A2-6A    | 2_AE002566 | - | 238647  | 238881  | 4943-5180 | 238  | ?    | 0 | NNNNNNNNNN | AGGAGTGGCG | AAATAAAAAAAAAAAAAAAAAAA | CACACACACA  |
| ?  | ?         | 0_AE003048 | + | 28301   | 28558   | 4918-5176 | 259  | 5'.  | 0 | TGGAAGCGGG | GCCTCATAT  | AAAAAAAAACAATAAAAAAAAA  | GGGTCCGTA   |
| ?  | ?         | 0_AE003322 | - | 43487   | 43418   | 4949-5180 | 232  | ?    | 0 | nnnnnnnnnn | TACGACGTGG | AAAAAAAAAGCAAAACATGGAAA | CAGTAAATGT  |
| ?  | ?         | 0_AE002918 | - | 28778   | 29049   | 4906-5177 | 272  | 5'.  | 0 | GGCGACTAAA | GGTGAAGGA  | TCGAGTTATAATAAAAAAAAA   | CACACACACC  |

Full-length elements: 4/1  
5' truncated elements: 3/17  
3' truncated elements: 0/0  
5'3' truncated elements: 1/18  
Unfinished elements: 4  
Total number of elements: 48  
Total length of elements: 67527  
TSD lengths (min/max): 5/16

## You

| Chr | Cyt       | Acc        | S | Coordinates | Element | Len       | Type | D    | 5' flank | TSD        | Start         | End                  | 3' flank               |            |
|-----|-----------|------------|---|-------------|---------|-----------|------|------|----------|------------|---------------|----------------------|------------------------|------------|
| 3L  | 79E-79F3  | 0_AE002647 | + | 2419411     | 2424785 | 5-5373    | 5369 | F    | 10       | GTACTGCTGT | ATATTTGCAA    | CGTCACCGAC           | GTTAAATAAAATAAATAAAA   | TTGACCAGCA |
| X   | 79E-19F6  | 0_AE002620 | + | 56440       | 61816   | 2-5373    | 5372 | F    | 13       | TCCTGATTTT | TAAGATGATGTGC | AGTCACCGAC           | TGTTAAATAAAATAAATAAAA  | TCAAAACAAG |
| X   | 1F-1F     | 0_AE002566 | - | 1119136     | 1124111 | 1-5373    | 5373 | F    | 11       | TATCATTTTT | AAATTTAGATA   | CGCAGTCACC           | TGTTAAATAAAATAAATAAAA  | GTCATACTTT |
| ?   | ?         | 0_AE003194 | - | 3969        | 8196    | 14-5373   | 5360 | F    | 0        | AAATCTGTGG | TATATCTCTT    | TATATCTCTT           | TTTGTAAATAAAATAAATAAAA | TAGTTCCTAA |
| ?   | ?         | 0_AE002635 | - | 2894        | 6936    | 284-5103  | 4820 | 5'3' | 0        | TCCTCTGGAG | TACCAGACCT    | CCAACTAGGCGGGGACGAGC | CCAACTAGGCGGGGACGAGC   | ATTTGAATAA |
| ?   | ?         | 0_AE002569 | - | 308         | 4611    | 194-5194  | 5001 | 5'3' | 6        | TGCAAATCCA | AAAAACA       | TTCAATATCC           | ATTTCTTTAGGCTTATTATAT  | ATTAACCCAT |
| ?   | ?         | 0_AE003172 | + | 3125        | 6529    | 35-5371   | 5337 | 5'.  | 0        | CTTCCAATT  | GTGTGCGCTT    | TTTGTAAATAAAATAAACA  | TTTGTAAATAAAATAAACA    | TTTATTGCAA |
| 2L  | 1F-39E3   | 0_AE002725 | + | 53283       | 55586   | 1366-5350 | 3985 | 5'3' | 0        | GGCGGAGCA  | AATGCTCTAA    | TAATTTTGTAAATAAGTAA  | TAATTTTGTAAATAAGTAA    | ACTCATCCGT |
| 2L  | 40A4-?    | 0_AE002725 | + | 562247      | 566169  | 263-4778  | 4516 | 5'3' | 7        | TCAAATTAAC | AAAAATA       | AGTGAATAA            | GGGTGCTCTAATAGACTCCA   | TTTGGGAAC  |
| ?   | ?         | 0_AE002816 | - | 1547        | 2160    | 4745-5373 | 629  | 5'.  | 0        | TTCTAAGTTC | AAAAATCATC    | AAAAATCATC           | TATTAATAAAAAAAAAATA    | AACATGATTA |
| ?   | ?         | 0_AE002816 | - | 3085        | 3527    | 3149-3654 | 506  | 5'3' | 0        | AAAAACGCT  | AACCTAGAAA    | AACCTAGAAA           | AATAATATAAATAATTAGAAA  | TTAACTTTT  |
| ?   | ?         | 0_AE002601 | - | 5105        | 6524    | 3853-5373 | 1521 | 5'.  | 12       | GCTGCTAAAT | ATATATTTAAGA  | AACCTAGATT           | CTAATTTGGTTAATTAATAA   | GAAGGAACA  |
| ?   | ?         | 0_AE002975 | + | 1964        | 2524    | 35-904    | 870  | 5'?  | 0        | CTTCCAATT  | GTGTGCGATT    | GTGTGCGATT           | ATGCATAGCATTTCTGTGT    | nnnnnnnnnn |
| 2R  | 60F1-60F1 | 1_AE002575 | - | 1415337     | 1416329 | 3214-4224 | 1011 | 5'3' | 0        | GCTCTTAAAT | ATATTCGTGT    | GCTAACCAGACTTCGGAG   | GCTAACCAGACTTCGGAG     | AGCTCAAAGA |
| ?   | ?         | 0_AE002743 | - | 16097       | 16307   | 5024-5231 | 208  | 5'3' | 0        | GGCGACCTT  | CATCCGCTTA    | CATCCGCTTA           | ATATCCAAAATAAACCAA     | AACCTGTAG  |
| ?   | ?         | 0_AE002743 | - | 19501       | 20697   | 3438-4990 | 1553 | 5'3' | 0        | CCCTGGCGG  | CGGAACACC     | CGGAACACC            | AAGCCACTACCGAACGTACA   | AGCTCAAAGA |
| ?   | ?         | 0_AE003394 | - | 12422       | 12869   | 4493-4940 | 448  | 5'3' | 0        | TAACATTTTA | CACCGACTCA    | CACCGACTCA           | CACCTCTCATGCACGGTAC    | ATGATTTGCC |
| ?   | ?         | 0_AE002955 | + | 2383        | 2481    | 115-518   | 404  | 5'?  | 0        | GTTACATTA  | TATTTATCAT    | TATTTATCAT           | ACCTCTTACCTGGCTTATG    | nnnnnnnnnn |
| ?   | ?         | 0_AE002840 | + | 10667       | 10634   | 194-466   | 273  | 5'?  | 0        | AATCCAAAA  | CATTCAATAT    | CATTCAATAT           | CCTTCTTGTGGTTAACT      | nnnnnnnnnn |

Full-length elements: 3/1  
5' truncated elements: 1/2  
3' truncated elements: 0/0  
5'3' truncated elements: 2/7  
Unfinished elements: 3  
Total number of elements: 19  
Total length of elements: 52556  
TSD lengths (min/max): 6/13
